# Supplementary material for: Cellular level lipidomics of two-dimensional cultures of adherent gut epithelial cell lines confirms a metabolic switch
Source: Analyst. 2026 Apr 27;151(11):3267–75. doi: 10.1039/d5an01183c (PMC13125980; doi:10.1039/d5an01183c)
Supplement: AN-151-D5AN01183C-s001 [file AN-151-D5AN01183C-s001.xlsx]

## Sheet: Xu et al Supplementary_Data She
Feature_ID	Bulk_EquiSPLASH	Bulk_EquiSPLASH	Bulk_EquiSPLASH	Bulk_EquiSPLASH	Bulk_EquiSPLASH	CaCo02	CaCo02	CaCo02	CaCo02	CaCo02	CaCo02	CaCo02	CaCo02	CaCo02	CaCo02	CaCo02	HT29	HT29	HT29	HT29	HT29	HT29	HT29	HT29	HT29
Cer(20:1)_Sphingolipids_Ceramides_N-acylsphingosines (ceramides)_342.3003@2.06																				65098.4			29605.3
Cer(20:1)_Sphingolipids_Ceramides_N-acylsphingosines (ceramides)_342.3003@2.45
Cer(20:1)_Sphingolipids_Ceramides_N-acylsphingosines (ceramides)_342.3005@2.68																	79778.6	54103.4	64645.4	54789.2
Cer(33:1)_Sphingolipids_Ceramides_N-acylsphingosines (ceramides)_522.4940@15.37			80737.4
Cer(34:0)_Sphingolipids_Ceramides_N-acylsphingosines (ceramides)_538.5196@14.36						226458	235076	211475	249133	240551	195659	186486	195839	146638	193456	192006		126515	139290		135578	64650.3	104745		92486.3
Cer(34:0)_Sphingolipids_Ceramides_N-acylsphingosines (ceramides)_540.5352@15.06							41244.9
Cer(34:0)_Sphingolipids_Ceramides_N-acylsphingosines (ceramides)_540.5354@18.55
Cer(34:3)_Sphingolipids_Ceramides_Ceramide phosphocholines (sphingomyelins)_550.4866@22.19												24684.2
Cer(35:0)_Sphingolipids_Ceramides_N-acylsphingosines (ceramides)_554.5511@13.15						58225.2			78178.6	75878.4	76468.3	63966.4				64028	138282	136857	148070	173769	118516	110770	122220	106582	76318.3
Cer(35:0)_Sphingolipids_Ceramides_N-acylsphingosines (ceramides)_554.5514@16.17																	96561.7	130113		109220	97348.6
Cer(35:0)_Sphingolipids_Ceramides_N-acylsphingosines (ceramides)_570.5476@12.04		74560.2		110442	127273	87926.2		88085.4	86993.9	78893.3		105723	71277.8	64344.4	67127.9	81010.9	55177.1		86179.1	32645.4	89632.4		99679.6	85348.2	76225.5
Cer(35:0)_Sphingolipids_Ceramides_N-acylsphingosines (ceramides)_570.5476@12.58	200212	148768	195664	193991	208182	171274	162149	161142	174604	165200	127332	161393	131880	154049	138691	148707	133371	161471	133620	151160	158324	136318	147029	168707	128258
Cer(35:0)_Sphingolipids_Ceramides_N-acylsphingosines (ceramides)_570.5477@17.00		29891.4
Cer(35:1)_Sphingolipids_Ceramides_Sphingoid base analogs_550.5256@25.15		191609	169542								308490	146231											234206
Cer(35:2)_Sphingolipids_Ceramides_Simple Glc series_548.5041@17.93
Cer(36:0)_Sphingolipids_Ceramides_N-acylsphingosines (ceramides)_568.5666@18.26																							112254
Cer(36:0)_Sphingolipids_Ceramides_N-acylsphingosines (ceramides)_568.5667@18.55
Cer(36:0)_Sphingolipids_Ceramides_N-acylsphingosines (ceramides)_568.5667@19.68
Cer(36:0)_Sphingolipids_Ceramides_N-acylsphingosines (ceramides)_584.5610@20.65				47046.5																		26296.1		36281.9
Cer(36:0)_Sphingolipids_Ceramides_N-acylsphingosines (ceramides)_600.5564@20.80										123125
Cer(36:0)_Sphingolipids_Ceramides_N-acylsphingosines (ceramides)_600.5565@19.87																48212.3
Cer(36:0)_Sphingolipids_Ceramides_N-acylsphingosines (ceramides)_600.5566@21.02
Cer(36:0)_Sphingolipids_Ceramides_N-acylsphingosines (ceramides)_614.5721@17.73						28865.4														21077.5
Cer(36:0)_Sphingolipids_Ceramides_N-acylsphingosines (ceramides)_614.5721@21.52				127451										114154	92649.9	106775	106881							63420.8
Cer(36:0)_Sphingolipids_Ceramides_N-acylsphingosines (ceramides)_614.5722@18.99	42731.6	72067	47058.2	46902.5		77463.7	115563	117517		74930.1	82704.5	62351	62698.1	72658.7	72334.6		110389	99078.3		109780	148790	154561	100622	119125	70597.9
Cer(36:1)_Sphingolipids_Ceramides_N-acylsphingosines (ceramides)_582.5459@10.24															30071.5
Cer(36:2)_Sphingolipids_Ceramides_N-acylsphingosines (ceramides)_562.5170@15.10																49580
Cer(36:2)_Sphingolipids_Ceramides_N-acylsphingosines (ceramides)_564.5365@16.91
Cer(36:2)_Sphingolipids_Ceramides_N-acylsphingosines (ceramides)_564.5366@15.48										85170.7
Cer(36:2)_Sphingolipids_Ceramides_Simple Glc series_562.5197@17.94
Cer(36:2)_Sphingolipids_Ceramides_Simple Glc series_564.5366@18.59
Cer(36:2)_Sphingolipids_Ceramides_Simple Glc series_564.5367@19.20							92214.6				96218.2									29266.6
Cer(36:3)_Sphingolipids_Ceramides_N-acylsphingosines (ceramides)_560.5015@14.35						457887	473155	350467	411995	429537	380424	408087	423944	328582	338246	417159		259688	233512		303618	145160	149398	183063	192519
Cer(37:0)_Sphingolipids_Ceramides_N-acylsphingosines (ceramides)_582.5822@15.36															28266.2					57750.8	66272.6	55600.7	79208.7
Cer(37:0)_Sphingolipids_Ceramides_N-acylsphingosines (ceramides)_628.5878@22.28												26581.5				27502.9
Cer(37:0)_Sphingolipids_Ceramides_N-acylsphingosines (ceramides)_628.5879@21.03					87923.7			109084		55324.4												68720.9	71119.1	73034.8	74856.7
Cer(37:0)_Sphingolipids_Ceramides_N-acylsphingosines (ceramides)_628.5879@22.03
Cer(37:1)_Sphingolipids_Ceramides_N-acylsphingosines (ceramides)_562.5620@16.52											21685.6
Cer(37:1)_Sphingolipids_Ceramides_N-acylsphingosines (ceramides)_562.5621@17.53												155692	100797
Cer(37:1)_Sphingolipids_Ceramides_Sphingoid base analogs_562.5620@25.15															145381										125947
Cer(37:2)_Sphingolipids_Ceramides_N-acylsphingosines (ceramides)_576.5353@15.94																							49679.2		81389.3
Cer(37:2)_Sphingolipids_Ceramides_Simple Glc series_576.5353@17.93
Cer(37:2)_Sphingolipids_Ceramides_Sphingoid base analogs_578.5569@25.10		236359	235833		218276		233449				255652			220828			237586		214004			240551			337502
Cer(38:0)_Sphingolipids_Ceramides_N-acylsphingosines (ceramides)_596.5980@20.93								23074.2			5337.79
Cer(38:0)_Sphingolipids_Ceramides_N-acylsphingosines (ceramides)_596.5981@19.67
Cer(38:0)_Sphingolipids_Ceramides_N-acylsphingosines (ceramides)_612.5927@21.62							45452.7																		57199.9
Cer(38:0)_Sphingolipids_Ceramides_N-acylsphingosines (ceramides)_642.6035@19.01																						83710.5
Cer(38:0)_Sphingolipids_Ceramides_N-acylsphingosines (ceramides)_642.6035@20.07
Cer(38:0)_Sphingolipids_Ceramides_N-acylsphingosines (ceramides)_642.6035@22.51									41927.4	49611.9						35810.1
Cer(38:1)_Sphingolipids_Ceramides_N-acylsphingosines (ceramides)_610.5773@12.05	285942	327111	253902	282807	277645	254796	337428	257406	282167	267955	283008	224256	228769	241937	592111	247865	581154	337423	321104	382447	323208	284399	370907	309114	271447
Cer(38:2)_Sphingolipids_Ceramides_N-acylsphingosines (ceramides)_592.5670@16.83															50928.8
Cer(38:2)_Sphingolipids_Ceramides_Other Neutral glycosphingolipids_592.5679@17.79									76535.5					58244.1						39999.4
Cer(38:2)_Sphingolipids_Ceramides_Simple Glc series_592.5679@18.39
Cer(38:2)_Sphingolipids_Ceramides_Simple Glc series_592.5681@19.77
Cer(38:2)_Sphingolipids_Ceramides_Simple Glc series_592.5682@20.51
Cer(39:0)_Sphingolipids_Ceramides_N-acylsphingosines (ceramides)_656.6189@22.98
Cer(39:0)_Sphingolipids_Ceramides_N-acylsphingosines (ceramides)_656.6189@23.19															57359.2	26960.6
Cer(39:1)_Sphingolipids_Ceramides_N-acylsphingosines (ceramides)_640.5878@12.12
Cer(39:1)_Sphingolipids_Ceramides_Simple Glc series_640.5872@19.06									43254.7
Cer(39:1)_Sphingolipids_Ceramides_Sphingoid base analogs_590.5934@25.09
Cer(40:0)_Sphingolipids_Ceramides_N-acylsphingosines (ceramides)_640.6247@22.60							44798.5												41722.5
Cer(40:0)_Sphingolipids_Ceramides_N-acylsphingosines (ceramides)_670.6349@20.07						54432.4	42122					74004.5			60098.2		92095	54229.6	94151.7	157945	61119.6		57665.8
Cer(40:1)_Sphingolipids_Ceramides_N-acylsphingosines (ceramides)_636.5904@15.59	31143.1
Cer(40:1)_Sphingolipids_Ceramides_N-acylsphingosines (ceramides)_638.6085@13.95
Cer(40:1)_Sphingolipids_Ceramides_N-acylsphingosines (ceramides)_654.6026@13.10																							27585.8
Cer(40:2)_Sphingolipids_Ceramides_Ceramide phosphoethanolamines_636.5965@22.24
Cer(40:2)_Sphingolipids_Ceramides_Ceramide phosphoinositols_602.5906@22.71										98037.5
Cer(40:2)_Sphingolipids_Ceramides_Ceramide phosphoinositols_602.5907@24.16
Cer(40:2)_Sphingolipids_Ceramides_Ceramide phosphoinositols_602.5910@23.65	151635
Cer(40:2)_Sphingolipids_Ceramides_Lysosphingomyelins and lysoglycosphingolipids_602.5910@24.46																			85378.5		63417.6
Cer(40:2)_Sphingolipids_Ceramides_Simple Glc series_602.5906@21.82															56001.4
Cer(40:2)_Sphingolipids_Ceramides_Simple Glc series_602.5907@22.13	66002.1		53947.3				40050.3			119708				60042.3				106546			121622				33653.7
Cer(40:2)_Sphingolipids_Ceramides_Sphingoid base analogs_602.5907@25.05																				29966.1					16011.8
Cer(41:1)_Sphingolipids_Ceramides_4-Hydroxysphinganines (Phytosphingosines)_634.6193@24.37																									69244
Cer(41:1)_Sphingolipids_Ceramides_Ceramide phosphoinositols_636.6344@22.90						67556.2
Cer(41:1)_Sphingolipids_Ceramides_N-acylsphingosines (ceramides)_668.6190@14.01
Cer(41:1)_Sphingolipids_Ceramides_Simple Glc series_618.6249@19.25
Cer(41:1)_Sphingolipids_Ceramides_Simple Glc series_634.6193@18.91			46440							29916.4
Cer(41:1)_Sphingolipids_Ceramides_Sphingoid base analogs_618.6245@25.10		179788			191833						228565											220686		161905
Cer(41:1)_Sphingolipids_Ceramides_Sphingoid base analogs_634.6192@25.10				86581.8	67349								81972.1	83578.6								131776
Cer(41:1)_Sphingolipids_Ceramides_Sphingoid base analogs_634.6195@25.00	76595.4																								64168.8
Cer(41:1)_Sphingolipids_Ceramides_Sphingoid base analogs_636.6338@24.88						24287.8
Cer(42:0)_Sphingolipids_Ceramides_N-acylsphingosines (ceramides)_650.6451@20.24																29942.1
Cer(42:1)_Sphingolipids_Ceramides_N-acylsphingosines (ceramides)_664.6201@25.37
Cer(42:1)_Sphingolipids_Ceramides_N-acylsphingosines (ceramides)_664.6236@14.52															55723.5
Cer(42:1)_Sphingolipids_Ceramides_N-acylsphingosines (ceramides)_664.6239@14.20															49981.7
Cer(42:1)_Sphingolipids_Ceramides_N-acylsphingosines (ceramides)_666.6398@15.80
Cer(42:2)_Sphingolipids_Ceramides_Ceramide phosphocholines (sphingomyelins)_630.6224@22.21	49438.3																			62334.4
Cer(42:2)_Sphingolipids_Ceramides_Ceramide phosphoethanolamines_630.6222@22.44
Cer(42:2)_Sphingolipids_Ceramides_Ceramide phosphoinositols_630.6218@24.07													81446.9
Cer(42:2)_Sphingolipids_Ceramides_Ceramide phosphoinositols_630.6222@23.18					81261.5													89438.4
Cer(42:2)_Sphingolipids_Ceramides_N-acylsphingosines (ceramides)_646.6118@19.52																			30715.7		22504.8
Cer(42:2)_Sphingolipids_Ceramides_Simple Glc series_648.6305@20.37
Cer(42:2)_Sphingolipids_Ceramides_Simple Glc series_648.6308@19.05
Cer(42:2)_Sphingolipids_Ceramides_Simple Glc series_648.6308@20.91					60164.9
Cer(42:2)_Sphingolipids_Ceramides_Sphingoid base analogs_630.6214@24.62														48646.1
Cer(43:1)_Sphingolipids_Ceramides_N-acylsphingosines (ceramides)_696.6503@15.85
Cer(43:1)_Sphingolipids_Ceramides_Simple Glc series_662.6510@20.01																				87430.5
Cer(43:1)_Sphingolipids_Ceramides_Sphingoid base analogs_662.6509@24.86
Cer(43:2)_Sphingolipids_Ceramides_N-acylsphingosines (ceramides)_660.6348@21.92									8306.93
Cer(44:1)_Sphingolipids_Ceramides_N-acylsphingosines (ceramides)_708.6466@25.35																		47363.6			23870.9
Cer(44:1)_Sphingolipids_Ceramides_N-acylsphingosines (ceramides)_726.6608@21.53																								37341.3
Cer(44:2)_Sphingolipids_Ceramides_Ceramide phosphoethanolamines_658.6546@22.70
Cer(44:2)_Sphingolipids_Ceramides_N-acylsphingosines (ceramides)_674.6425@20.54									77536.6	49785	77105.6		54740.2			70255.3					57084.7			52915.3
Cer(44:2)_Sphingolipids_Ceramides_N-acylsphingosines (ceramides)_674.6445@17.49														54236.2
Cer(45:1)_Sphingolipids_Ceramides_Simple Glc series_674.6869@20.70				89027.2
Cer(45:1)_Sphingolipids_Ceramides_Simple Glc series_674.6873@20.26												74752.3
Cer(45:1)_Sphingolipids_Ceramides_Sphingoid base analogs_674.6871@25.14														209007
Cer(45:2)_Sphingolipids_Ceramides_Simple Glc series_690.6814@20.70										55203.8	29636.5						62647.8
Cer(45:2)_Sphingolipids_Ceramides_Sphingoid base analogs_690.6817@24.85									76661.2						162644
Cer(46:2)_Sphingolipids_Ceramides_N-acylsphingosines (ceramides)_702.6739@21.37																						58107.7	41093.2
Cer(47:1)_Sphingolipids_Ceramides_Simple Glc series_702.7182@21.28
Cer(47:1)_Sphingolipids_Ceramides_Sphingoid base analogs_702.7181@24.94		190005				129725			157311					62790.6		66456.6								106064
Cer(47:1)_Sphingolipids_Ceramides_Sphingoid base analogs_702.7182@25.05		46990.1				35728.1			68159.8		60256.2													103803
Cer(47:2)_Sphingolipids_Ceramides_Simple Glc series_718.7130@21.46				32098.4				6835.24												99156.9
Cer(47:2)_Sphingolipids_Ceramides_Simple Glc series_718.7133@20.42												50361.6
Cer(47:2)_Sphingolipids_Ceramides_Sphingoid base analogs_718.7126@24.87				52358	130669			134165	75319.8														133710
Cer(47:2)_Sphingolipids_Ceramides_Sphingoid base analogs_718.7131@24.75				49754		142383		76198.8	68758.1			88761.8					89083.6	47011.3							89759.4
Cer(49:1)_Sphingolipids_Ceramides_Ceramide phosphoethanolamines_746.7441@22.59								85913.4													56354.2
Cer(49:1)_Sphingolipids_Ceramides_Lysosphingomyelins and lysoglycosphingolipids_730.7494@24.45							199568								149897					190571					211853
Cer(49:1)_Sphingolipids_Ceramides_Lysosphingomyelins and lysoglycosphingolipids_746.7446@24.40													85217.6					121799		99717.2
Cer(49:1)_Sphingolipids_Ceramides_Simple Glc series_730.7490@22.15					88878.3								113017										94808.5
Cer(49:1)_Sphingolipids_Ceramides_Simple Glc series_730.7494@21.93												80058.7
Cer(49:1)_Sphingolipids_Ceramides_Simple Glc series_746.7439@21.46													37680.7
Cer(49:1)_Sphingolipids_Ceramides_Simple Glc series_746.7444@22.05	57556.6																	24775.5		119967
Cer(49:1)_Sphingolipids_Ceramides_Sphingoid base analogs_730.7497@24.62				65892.4				71330.8											40412.4	78443
Cer(49:1)_Sphingolipids_Ceramides_Sphingoid base analogs_730.7499@25.11																			108428
Cer(51:1)_Sphingolipids_Ceramides_Ceramide phosphocholines (sphingomyelins)_774.7757@22.20
Cer(51:1)_Sphingolipids_Ceramides_Ceramide phosphoethanolamines_758.7807@22.52	43021.4					15245														127072				38860
Cer(51:1)_Sphingolipids_Ceramides_Ceramide phosphoinositols_758.7804@23.96
Cer(51:1)_Sphingolipids_Ceramides_Ceramide phosphoinositols_758.7807@22.93						156091				103540	36759.9		32815.9							113765
Cer(51:1)_Sphingolipids_Ceramides_Lysosphingomyelins and lysoglycosphingolipids_758.7806@24.53
Cer(51:1)_Sphingolipids_Ceramides_Lysosphingomyelins and lysoglycosphingolipids_774.7752@24.39										36972.2										33402.8	65601.3
Cer(51:1)_Sphingolipids_Ceramides_Simple Glc series_758.7811@21.75
Cer(51:1)_Sphingolipids_Ceramides_Sphingoid base analogs_792.7815@25.31																									45135.6
Cer(52:1)_Sphingolipids_Ceramides_4-Hydroxysphinganines (Phytosphingosines)_822.7915@24.27																42018.5
Cer(52:1)_Sphingolipids_Ceramides_Lysosphingomyelins and lysoglycosphingolipids_822.7934@24.56												103223				87031.7
Cer(52:1)_Sphingolipids_Ceramides_N-acylsphingosines (ceramides)_822.7932@17.32
Cer(52:1)_Sphingolipids_Ceramides_Simple Glc series_806.7990@21.88															46043.5
Cer(52:1)_Sphingolipids_Ceramides_Sphingoid base analogs_806.7986@24.67
Cer(52:1)_Sphingolipids_Ceramides_Sphingoid base analogs_806.7988@25.22
Cer(52:1)_Sphingolipids_Ceramides_Sphingoid base analogs_822.7936@25.07	86724.7		39216.8
Cer(53:1)_Sphingolipids_Ceramides_Ceramide phosphoethanolamines_802.8072@22.56
Cer(53:1)_Sphingolipids_Ceramides_Simple Glc series_802.8083@22.05
Cer(53:1)_Sphingolipids_Ceramides_Sphingoid base analogs_786.8114@24.71
Cer(53:1)_Sphingolipids_Ceramides_Sphingoid base analogs_804.8146@25.26												27990
CerP(42:2)_Sphingolipids_Ceramides_N-acylsphingosines (ceramides)_728.5885@8.11			51716.1			115042	124125	118280	132908	110202	162061	100558	119166	108129	110379	103028	180862	170908	178719	199778	174640	142177	206046	156201	185444
DG(31:0)_Glycerolipids_Diradylglycerols_Dialkylglycerols_572.5251@19.88			89787.2	92680					104926													84854.5	124519
DG(31:0)_Glycerolipids_Diradylglycerols_Glycosyldiacylglycerols_572.5249@20.16
DG(31:1)_Glycerolipids_Diradylglycerols_Monoalkylglycerols_553.4887@22.65
DG(31:3)_Glycerolipids_Diradylglycerols_Dialkylglycerols_549.4490@18.52
DG(32:0)_Glycerolipids_Diradylglycerols_Diacylglycerols_586.5410@17.66			54080.9												50130.2	57507.9				71706.1	94076.5		79006.5	124038
DG(32:3)_Glycerolipids_Diradylglycerols_Diacylglycerols_563.4651@16.08																				266023	264831		262333	271393
DG(32:3)_Glycerolipids_Diradylglycerols_Diacylglycerols_563.4674@14.73
DG(32:3)_Glycerolipids_Diradylglycerols_Dialkylglycerols_563.4653@19.22
DG(32:3)_Glycerolipids_Diradylglycerols_Monoalkylglycerols_563.4661@22.21										23976.5
DG(33:2)_Glycerolipids_Diradylglycerols_Diacylglycerols_596.5264@15.04
DG(33:2)_Glycerolipids_Diradylglycerols_Diacylglycerols_596.5271@16.22		52976.2
DG(33:3)_Glycerolipids_Diradylglycerols_Diacylglycerols_577.4805@16.62			91823.5				86333.2							111819			146766					187154
DG(33:3)_Glycerolipids_Diradylglycerols_Diacylglycerols_577.4805@16.94		157058	117958	132427	152971	197666	132420		242647	164846	206860	166051	146925	162743	196773	146938	251121	246923	238439		267792	208175	220050	235152	205113
DG(33:3)_Glycerolipids_Diradylglycerols_Dialkylglycerols_577.4805@19.88
DG(33:3)_Glycerolipids_Diradylglycerols_Glycosyldiacylglycerols_577.4805@20.11
DG(34:1)_Glycerolipids_Diradylglycerols_Diacylglycerols_612.5564@17.79						73661.1										39481.4
DG(34:1)_Glycerolipids_Diradylglycerols_Diacylglycerols_612.5565@10.30																							127090
DG(34:2)_Glycerolipids_Diradylglycerols_Diacylglycerols_610.5401@16.99	2.89766e+06	2.78359e+06	2.76471e+06	2.86403e+06	2.87149e+06	2.65076e+06	2.6742e+06	2.63818e+06	2.62734e+06	2.56014e+06	2.36208e+06	2.46503e+06	2.19008e+06	2.37558e+06	2.28397e+06	2.48321e+06	2.43836e+06	2.34298e+06	2.31522e+06	2.29418e+06	2.46059e+06	2.12715e+06	2.64433e+06	2.26655e+06	2.34946e+06
DG(34:3)_Glycerolipids_Diradylglycerols_Diacylglycerols_591.4962@17.44																					86452.4
DG(34:3)_Glycerolipids_Diradylglycerols_Diacylglycerols_591.4962@17.70
DG(34:3)_Glycerolipids_Diradylglycerols_Diacylglycerols_608.5250@14.80						18884.6					91738.8						26936.6						71432.4	39977.7
DG(34:3)_Glycerolipids_Diradylglycerols_Glycosyldiacylglycerols_591.4960@20.24			39455.6		108679									28535.3			23155.4
DG(34:3)_Glycerolipids_Diradylglycerols_Glycosyldiacylglycerols_591.4963@20.48	159150			149922																107828			135443
DG(34:3)_Glycerolipids_Diradylglycerols_Glycosylmonoacylglycerols_591.4965@20.74
DG(34:4)_Glycerolipids_Diradylglycerols_Diacylglycerols_589.4807@16.51		101167	123171						214249		171151					102513	121190	177174	186270	256142	186379	173025	171228	168682
DG(34:6)_Glycerolipids_Diradylglycerols_Diacylglycerols_585.4490@14.77									94012.3			92447.7			90616.6
DG(35:3)_Glycerolipids_Diradylglycerols_Diacylglycerols_605.5118@18.12					104242		173687				183894		152429	155064	162478	205137		188876	195739	226479	274583	172524	250457		198234
DG(35:3)_Glycerolipids_Diradylglycerols_Diacylglycerols_605.5118@18.37		138911			123106	149461					139376	125225			126753		172767	183995	149726	194177	161382	186781
DG(35:3)_Glycerolipids_Diradylglycerols_Glycosylmonoacylglycerols_605.5119@20.89			68962.1				70528
DG(35:3)_Glycerolipids_Diradylglycerols_Monoacylglycerols_605.5118@21.02
DG(35:6)_Glycerolipids_Diradylglycerols_Diacylglycerols_599.4676@11.47																	55931.5			78919.8	45209			48033.6
DG(36:2)_Glycerolipids_Diradylglycerols_Diacylglycerols_638.5721@17.91							105667	50046	59921.9			59871.5	65910			114658		35811.3			62874.9			51097.1
DG(36:3)_Glycerolipids_Diradylglycerols_Dialkylglycerols_619.5275@19.00
DG(36:3)_Glycerolipids_Diradylglycerols_Dialkylglycerols_636.5573@19.93																	28269.3
DG(36:3)_Glycerolipids_Diradylglycerols_Monoacylglycerols_619.5275@21.30	112530				112066					110918		85186.1												85274.4
DG(36:3)_Glycerolipids_Diradylglycerols_Monoacylglycerols_619.5277@21.51
DG(36:3)_Glycerolipids_Diradylglycerols_Monoacylglycerols_636.5569@21.86
DG(36:4)_Glycerolipids_Diradylglycerols_Diacylglycerols_617.5119@17.81
DG(36:4)_Glycerolipids_Diradylglycerols_Diacylglycerols_617.5121@18.10									45284.6
DG(36:4)_Glycerolipids_Diradylglycerols_Diacylglycerols_617.5150@16.57																							37102.3	27414.7
DG(36:5)_Glycerolipids_Diradylglycerols_Diacylglycerols_615.4967@16.72																			53359.5		67691.3		50936.1
DG(36:6)_Glycerolipids_Diradylglycerols_Diacylglycerols_630.5086@18.05																				70223.7
DG(36:7)_Glycerolipids_Diradylglycerols_Diacylglycerols_628.4996@4.56																							1.40582e+06
DG(36:7)_Glycerolipids_Diradylglycerols_Diacylglycerols_628.4998@4.08
DG(36:7)_Glycerolipids_Diradylglycerols_Diacylglycerols_628.4998@4.27
DG(36:7)_Glycerolipids_Diradylglycerols_Monoalkylglycerols_628.4997@25.00									100281					210508		191197					182201
DG(36:7)_Glycerolipids_Diradylglycerols_Monoalkylglycerols_628.4999@25.13		195594			169427		174640		160958						152717			166250
DG(36:8)_Glycerolipids_Diradylglycerols_Diacylglycerols_626.4835@14.84										20509.9
DG(36:8)_Glycerolipids_Diradylglycerols_Diacylglycerols_626.4843@11.94	29000
DG(36:8)_Glycerolipids_Diradylglycerols_Diacylglycerols_626.4843@5.29																	178790	124760	119691	117922	121261	99128.5	141203	93869.4	72756.5
DG(36:8)_Glycerolipids_Diradylglycerols_Dialkylglycerols_626.4839@18.71													66667.9
DG(36:8)_Glycerolipids_Diradylglycerols_Monoalkylglycerols_626.4838@22.63																						67461.8
DG(36:8)_Glycerolipids_Diradylglycerols_Monoalkylglycerols_626.4842@24.46				42205.4									17823.8										38435.6
DG(36:8)_Glycerolipids_Diradylglycerols_Monoalkylglycerols_626.4845@24.93												58593.3
DG(37:1)_Glycerolipids_Diradylglycerols_Dialkylglycerols_637.5824@19.50				46397.6
DG(37:1)_Glycerolipids_Diradylglycerols_Dialkylglycerols_637.5827@20.11				82493.8
DG(37:1)_Glycerolipids_Diradylglycerols_Glycosylmonoacylglycerols_637.5713@20.67
DG(37:1)_Glycerolipids_Diradylglycerols_Monoalkylglycerols_637.5712@25.35
DG(37:1)_Glycerolipids_Diradylglycerols_Monoalkylglycerols_637.5716@22.54														67693.1
DG(37:1)_Glycerolipids_Diradylglycerols_Monoalkylglycerols_637.5717@23.31																							53277
DG(37:3)_Glycerolipids_Diradylglycerols_Dialkylglycerols_633.5425@19.56																								46122.2
DG(37:3)_Glycerolipids_Diradylglycerols_Monoacylglycerols_633.5430@22.02				129853	110371								161568									107780			111927
DG(37:3)_Glycerolipids_Diradylglycerols_Monoalkylglycerols_633.5427@22.23					114241						107604
DG(37:7)_Glycerolipids_Diradylglycerols_Diacylglycerols_642.5155@5.53																							50373.4
DG(38:2)_Glycerolipids_Diradylglycerols_Diacylglycerols_666.6031@12.74															203114
DG(38:2)_Glycerolipids_Diradylglycerols_Diacylglycerols_666.6033@12.40															111417
DG(38:3)_Glycerolipids_Diradylglycerols_Dialkylglycerols_647.5588@20.08
DG(38:3)_Glycerolipids_Diradylglycerols_Glycosyldiacylglycerols_647.5588@20.28		46263.4										108224										81597.9			43827.9
DG(38:4)_Glycerolipids_Diradylglycerols_Dialkylglycerols_645.5430@19.08				38487.3		294613	369349	330902	333999	300299	302109	269993	279493	226282	294271	383067		200809		111293	234991	150133	156250	149284	160056
DG(38:5)_Glycerolipids_Diradylglycerols_Diacylglycerols_643.5275@17.92						327533	384098	261605	293300	258107	305067	323504	274450			353532								301382
DG(38:7)_Glycerolipids_Diradylglycerols_Diacylglycerols_656.5312@6.53							70081.2		46174.9		62771.9	57676.4	64829.4		37168.2		103705	89021.6	92964.2	85194.6	78643.1	62070.8	128614	85599.2	81251.7
DG(38:8)_Glycerolipids_Diradylglycerols_Diacylglycerols_637.4803@17.92			66402.7
DG(38:8)_Glycerolipids_Diradylglycerols_Diacylglycerols_637.4820@14.31																					49305.3
DG(38:8)_Glycerolipids_Diradylglycerols_Diacylglycerols_637.4830@16.96			87085.6
DG(38:8)_Glycerolipids_Diradylglycerols_Diacylglycerols_637.4853@11.53
DG(38:8)_Glycerolipids_Diradylglycerols_Diacylglycerols_637.4879@6.74																80923.8
DG(38:8)_Glycerolipids_Diradylglycerols_Diacylglycerols_637.4882@15.93												47042
DG(38:8)_Glycerolipids_Diradylglycerols_Diacylglycerols_637.4895@7.40																57558
DG(38:8)_Glycerolipids_Diradylglycerols_Diacylglycerols_654.5148@7.10																							53110.4
DG(38:8)_Glycerolipids_Diradylglycerols_Dialkylglycerols_637.4809@19.03
DG(38:8)_Glycerolipids_Diradylglycerols_Dialkylglycerols_637.4813@18.90
DG(38:8)_Glycerolipids_Diradylglycerols_Dialkylglycerols_637.4856@19.59
DG(38:8)_Glycerolipids_Diradylglycerols_Monoalkylglycerols_637.4802@23.76																					45359.8
DG(38:9)_Glycerolipids_Diradylglycerols_Diacylglycerols_652.4998@5.53
DG(39:3)_Glycerolipids_Diradylglycerols_Monoalkylglycerols_661.5743@22.95										56562.3	68683.8												43359.6
DG(40:2)_Glycerolipids_Diradylglycerols_Diacylglycerols_694.6338@14.64															156955
DG(40:3)_Glycerolipids_Diradylglycerols_Monoacylglycerols_675.5903@21.06			83857.4						77370.3			58699.8	73025.8							94552.6	88882.2
DG(40:6)_Glycerolipids_Diradylglycerols_Dialkylglycerols_669.5409@18.52							83288.2			60239.2		41746.1			56147.2	104785
DG(40:7)_Glycerolipids_Diradylglycerols_Diacylglycerols_684.5623@8.21		58412.8		41341.4	51382.9	107348	103378	116261	107802	89132.5	123665	67089.4	92271.2	106057	87042	104204	171334	162617	193515	177435	165903	148937	179576	169451	186892
DG(41:4)_Glycerolipids_Diradylglycerols_Diacylglycerols_704.6189@2.14																							89914.7
DG(42:11)_Glycerolipids_Diradylglycerols_Diacylglycerols_704.5267@10.91							63120.3				30975.5		93440.3						49813
DG(42:3)_Glycerolipids_Diradylglycerols_Monoacylglycerols_703.6214@21.91			81401.7	98183.4		80347.1			74775.7	74189.2	98399.4	86622.4	102713	86400.4	98188.9			121164	114929	136137	108353	126686	93771.6
DG(42:4)_Glycerolipids_Diradylglycerols_Diacylglycerols_718.6322@6.83																	59564.3			43209.4	47737	50848.7	68032.3
DG(42:5)_Glycerolipids_Diradylglycerols_Glycosyldiacylglycerols_699.5959@20.51
DG(43:4)_Glycerolipids_Diradylglycerols_Dialkylglycerols_732.6481@19.21														50040.4					82713	47936.1		53055.2
DG(43:5)_Glycerolipids_Diradylglycerols_Diacylglycerols_730.6321@6.96										104184		125127		55881.5		111543						32439.8
DG(44:5)_Glycerolipids_Diradylglycerols_Glycosylmonoacylglycerols_744.6537@20.51
DG(44:8)_Glycerolipids_Diradylglycerols_Glycosylmonoacylglycerols_721.5778@20.51
DG(O-37:4)_Glycerolipids_Diradylglycerols_Diacylglycerols_617.5483@21.62																	115365
DG(O-38:8)_Glycerolipids_Diradylglycerols_Diacylglycerols_640.5361@8.31				28945.3	38291.4	67028.1	78806.8		103487	77231.9	107336	73759.6	94313.4	66889.2	81682.3		149390	130484	164432	160771	149263	133702	189674	140014	135790
DG(P-32:1)_Glycerolipids_Diradylglycerols_Diacylglycerols_551.5065@17.70									47947.8											62112.3
LPC(15:1)_Glycerophospholipids_Glycerophosphocholines_Diacylglycerophosphoglycerols_480.3091@2.97
LPC(18:0)_Glycerophospholipids_Glycerophosphocholines_Dialkylglycerophosphoglycerols_524.3713@4.44						149230			77054.3	77229.1			90898.1	78751.1	116028	99245.9					116555		57470.9	87893.9
LPC(18:1)_Glycerophospholipids_Glycerophosphocholines_Dialkylglycerophosphoglycerols_522.3562@3.12																	90434.5	108480	78964.5	84780.6				23747.9
LPC(18:2)_Glycerophospholipids_Glycerophosphocholines_Diacylglycerophosphoglycerols_520.3352@2.28										65494.7												39085.6
LPC(3:0)_Glycerophospholipids_Glycerophosphocholines_Diacylglycerophosphoglycerols_314.1345@2.94							204917
LPC(3:0)_Glycerophospholipids_Glycerophosphocholines_Monoacylglycerophosphoglycerols_314.1346@25.14							339078
LPC(3:0)_Glycerophospholipids_Glycerophosphocholines_Monoacylglycerophosphoglycerols_314.1346@6.83							71054.1
LPC(3:0)_Glycerophospholipids_Glycerophosphocholines_Monoacylglycerophosphoglycerols_314.1349@27.83		83882.3
LPC(7:0)_Glycerophospholipids_Glycerophosphocholines_Diacylglycerophosphoglycerols_370.2012@2.06																							288281
LPC(O-16:0)_Glycerophospholipids_Glycerophosphocholines_Monoacylglycerophosphoglycerols_482.3611@3.53							49782.7
LPC(O-20:4)_Glycerophospholipids_Glycerophosphocholines_Monoacylglycerophosphoglycerols_530.3630@2.57										204398	149308						122124		260765	127613			66476.4
LPE(O-19:1)_Glycerophospholipids_Glycerophosphoethanolamines_1-alkyl,2-acylglycerophosphoserines_496.3400@2.91
LPE(O-29:1)_Glycerophospholipids_Glycerophosphoethanolamines_1-alkyl,2-acylglycerophosphoserines_636.4909@20.23																				70547.4
LPE(O-29:1)_Glycerophospholipids_Glycerophosphoethanolamines_1-alkyl,2-acylglycerophosphoserines_636.4959@23.49
PC(19:1)_Glycerophospholipids_Glycerophosphocholines_Monoacylglycerophosphocholines_550.3506@3.19						89347.6	88722		156320	89878	69544.1	82995.2	126234
PC(22:0)_Glycerophospholipids_Glycerophosphocholines_Diacylglycerophosphocholines_594.4085@2.27										69748.6									95720.7
PC(25:0)_Glycerophospholipids_Glycerophosphocholines_Monoalkylglycerophosphocholines_636.4601@5.32						360434	238802	122768		185825		197281	154227		125004	130269
PC(25:0)_Glycerophospholipids_Oxidized glycerophospholipids_Chalcones and dihydrochalcones_666.4347@3.74																	126996	126308	106868	73911.8	99827	62675.9		46132.1
PC(26:1)_Glycerophospholipids_Glycerophosphocholines_Diacylglycerophosphoglycerols_648.4624@19.09
PC(27:0)_Glycerophospholipids_Glycerophosphocholines_1-(1Z-alkenyl),2-acylglycerophosphoethanolamines_664.4921@7.18						86204.2
PC(30:0)_Glycerophospholipids_Glycerophosphocholines_1-alkyl,2-acylglycerophosphoethanolamines_706.5383@12.49						380000	472059	374822	383819	326390	351152	520610	503543	198607	328008	628278					109538
PC(30:1)_Glycerophospholipids_Glycerophosphocholines_1-alkyl,2-acylglycerophosphoethanolamines_704.5227@10.75													96412.1			183192
PC(32:0)_Glycerophospholipids_Glycerophosphocholines_1-(1Z-alkenyl),2-acylglycerophosphoglycerols_734.5696@14.55						638516	706208	481754	683987	509660	527164	748023	872112	368761	594975	977144		135579	102266		228270
PC(32:1)_Glycerophospholipids_Glycerophosphocholines_1-alkyl,2-acylglycerophosphoethanolamines_732.5540@12.85						2.6487e+06	3.78255e+06	2.80868e+06	3.18778e+06	2.51627e+06	2.60739e+06	4.11332e+06	4.04892e+06	1.85101e+06	2.7405e+06	5.05198e+06		960684	881594		1.75308e+06	496669		707004	1.32798e+06
PC(32:1)_Glycerophospholipids_Glycerophosphocholines_Diacylglycerophosphocholines_732.5471@2.74
PC(32:1)_Glycerophospholipids_Glycerophosphocholines_Monoacylglycerophosphocholines_732.5471@2.95																							650223
PC(32:2)_Glycerophospholipids_Glycerophosphocholines_1-alkyl,2-acylglycerophosphoethanolamines_730.5382@11.13							371584				219093	408953	342350		197582	506740
PC(32:5)_Glycerophospholipids_Glycerophosphocholines_Diacylglycerophosphoglycerols_724.4890@16.75
PC(33:1)_Glycerophospholipids_Glycerophosphocholines_Diacylglycerophosphoglycerols_746.5700@16.83																28609.6
PC(33:1)_Glycerophospholipids_Glycerophosphocholines_Monoacylglycerophosphocholines_746.5627@3.26
PC(33:1)_Glycerophospholipids_Glycerophosphocholines_Monoacylglycerophosphocholines_746.5627@3.36
PC(33:1)_Glycerophospholipids_Glycerophosphocholines_Monoacylglycerophosphocholines_746.5628@2.84																					73807.4
PC(33:1)_Glycerophospholipids_Glycerophosphocholines_Monoacylglycerophosphocholines_746.5628@3.59													104840				106915	92836.1	102465	118869	94885.4	87727.1	129303	71858.1	95246.4
PC(33:1)_Glycerophospholipids_Glycerophosphocholines_Monoalkylglycerophosphoethanolamines_746.5695@13.79						334574	529238	362450	427017	292594	334473	579777	644997	179925	377278	710138
PC(33:2)_Glycerophospholipids_Glycerophosphocholines_1-alkyl,2-acylglycerophosphoglycerols_744.5539@15.25									45756.2							111298
PC(34:0)_Glycerophospholipids_Glycerophosphocholines_Diacylglycerophosphoglycerols_762.6007@16.44
PC(34:0)_Glycerophospholipids_Glycerophosphocholines_Diacylglycerophosphoglycerols_762.6080@22.00					56739.1
PC(34:1)_Glycerophospholipids_Glycerophosphocholines_1-alkyl,2-acylglycerophosphoglycerols_760.5853@14.79						4.55408e+06	5760057	4.73975e+06	5.46708e+06	3.82426e+06	4.19848e+06	6.44085e+06	7.19017e+06	3.18665e+06	4.87161e+06	8.2824e+06		1.17044e+06	1.11604e+06	319804	2.18317e+06	700309	508788	891099	1.7253e+06
PC(34:1)_Glycerophospholipids_Glycerophosphocholines_Monoacylglycerophosphocholines_760.5784@3.93
PC(34:1)_Glycerophospholipids_Glycerophosphocholines_Monoacylglycerophosphocholines_760.5784@4.10
PC(34:1)_Glycerophospholipids_Glycerophosphocholines_Monoacylglycerophosphocholines_760.5785@4.39													57174.6				70293.4	63919.9		85629.7	69638.9		394363
PC(34:2)_Glycerophospholipids_Glycerophosphocholines_Diacylglycerophosphoethanolamines_758.5695@13.05						2.32331e+06	3.10622e+06	2.26132e+06	2.62626e+06	2.02637e+06	2.16464e+06	3.47765e+06	3.54499e+06	1.50931e+06	2.28665e+06	4.40843e+06		681220	591100		1.24465e+06	298805	96357.2	432753	951406
PC(34:4)_Glycerophospholipids_Glycerophosphocholines_1-alkyl,2-acylglycerophosphoethanolamines_754.5355@12.75																120922
PC(34:5)_Glycerophospholipids_Glycerophosphocholines_Diacylglycerophosphoglycerols_752.5172@24.07
PC(35:1)_Glycerophospholipids_Glycerophosphocholines_1-alkyl,2-acylglycerophosphoglycerols_774.6008@15.34																103513
PC(35:1)_Glycerophospholipids_Glycerophosphocholines_Diacylglycerophosphoglycerols_774.6005@15.74																208849
PC(35:2)_Glycerophospholipids_Glycerophosphocholines_Monoalkylglycerophosphoethanolamines_772.5852@14.02						148623	310117		208498	119194	176686	333249	337776	105484	174078	405054
PC(35:4)_Glycerophospholipids_Glycerophosphocholines_Diacylglycerophosphoglycerols_768.5543@15.45
PC(35:5)_Glycerophospholipids_Glycerophosphocholines_Diacylglycerophosphocholines_766.5314@2.44
PC(36:1)_Glycerophospholipids_Glycerophosphocholines_1-(1Z-alkenyl),2-acylglycerophosphoethanolamines_788.6097@6.35						56886.1	66677.1	61712	68155.2	54562.6	95375.9	46000.4	66141.4	67617.6		50973.7	121272	139091	131666	113855	109806	68769.2	135632	76712.1	135560
PC(36:1)_Glycerophospholipids_Glycerophosphocholines_Diacylglycerophosphoglycerols_788.6165@16.69						440310	498802	391048	504174	280857	380521	623665	655855	318587	416234	797596					216335				149577
PC(36:2)_Glycerophospholipids_Glycerophosphocholines_1-alkyl,2-acylglycerophosphoglycerols_786.6008@14.99						2.90006e+06	3.62429e+06	2.82333e+06	3.17871e+06	2.17448e+06	2.65385e+06	4.08989e+06	4.73674e+06	1.97648e+06	2.83556e+06	5.4973e+06		624345	502844		1.13771e+06	278991	116862	355098	921069
PC(36:2)_Glycerophospholipids_Glycerophosphocholines_Diacylglycerophosphoglycerols_786.6007@15.36						302899				171225	264229		486495			562701
PC(36:3)_Glycerophospholipids_Glycerophosphocholines_Monoalkylglycerophosphocholines_784.5783@5.32
PC(36:3)_Glycerophospholipids_Glycerophosphocholines_Monoalkylglycerophosphoethanolamines_784.5849@13.55						194002	248681	166580	231148			353683	327837		180486	453792
PC(36:4)_Glycerophospholipids_Glycerophosphocholines_1-alkyl,2-acylglycerophosphoglycerols_782.5670@14.78							223070	147032	183051			195198	261626		124656	342996
PC(36:4)_Glycerophospholipids_Glycerophosphocholines_Diacylglycerophosphoethanolamines_782.5704@13.07
PC(36:5)_Glycerophospholipids_Glycerophosphocholines_1-alkyl,2-acylglycerophosphoethanolamines_780.5512@13.04																68134.9
PC(37:3)_Glycerophospholipids_Glycerophosphocholines_1-alkyl,2-acylglycerophosphoethanolamines_798.5980@9.42							104436		78059.6				108263	91576.2								102912
PC(37:4)_Glycerophospholipids_Glycerophosphocholines_Diacylglycerophosphoglycerols_796.5858@16.64
PC(37:5)_Glycerophospholipids_Glycerophosphocholines_Diacylglycerophosphoglycerols_794.5698@16.19
PC(37:6)_Glycerophospholipids_Glycerophosphocholines_1-alkyl,2-acylglycerophosphoglycerols_792.5542@15.04
PC(38:1)_Glycerophospholipids_Glycerophosphocholines_1-acyl,2-alkylglycerophosphoethanolamines_816.6409@7.94						117491			140642	124313	163017						209210	202491	218278	177877	178318	160119	198251	150142	234747
PC(38:4)_Glycerophospholipids_Glycerophosphocholines_1-(1Z-alkenyl),2-acylglycerophosphoethanolamines_810.6050@6.48																		90508.9	65763.1		83401.8
PC(38:4)_Glycerophospholipids_Glycerophosphocholines_1-alkyl,2-acylglycerophosphoglycerols_810.6013@15.23
PC(38:4)_Glycerophospholipids_Glycerophosphocholines_Diacylglycerophosphoglycerols_810.5982@16.69
PC(38:5)_Glycerophospholipids_Glycerophosphocholines_1-alkyl,2-acylglycerophosphoglycerols_808.5831@14.95													109866			205588
PC(40:4)_Glycerophospholipids_Glycerophosphocholines_1-acyl,2-alkylglycerophosphoethanolamines_838.6362@8.71																	90943.8	102956	78529.7		66250.9
PC(40:5)_Glycerophospholipids_Glycerophosphocholines_1-alkyl,2-acylglycerophosphoethanolamines_836.6238@9.85		93436.6									110506			81172.5			128919		75616.8	107508	79660.2		78891.8	93426.8
PC(42:3)_Glycerophospholipids_Glycerophosphocholines_Diacylglycerophosphoglycerols_868.6876@22.89											111801
PC(O-30:0)_Glycerophospholipids_Glycerophosphocholines_Diacylglycerophosphocholines_692.5590@13.87						312487	466477	262659	445942		318105	502342	419121	241374	281397	713020
PC(O-31:0)_Glycerophospholipids_Glycerophosphocholines_Diacylglycerophosphocholines_706.5747@14.48							103438	43997.7	79765.3
PC(O-32:0)_Glycerophospholipids_Glycerophosphocholines_Diacylglycerophosphocholines_720.5903@15.91						873744	1.14458e+06	760702	1.18661e+06	690673	847754	1.18415e+06	1.0917e+06	635730	809261	1.84257e+06			274118		474171			207263	426863
PC(O-32:1)_Glycerophospholipids_Glycerophosphocholines_Diacylglycerophosphocholines_718.5746@14.24						2.02325e+06	2.94014e+06	1.96645e+06	2.54216e+06	1.82007e+06	2.03106e+06	2.77409e+06	2.6367e+06	1.79429e+06	2.01961e+06	4.33085e+06		1.20564e+06	1.14982e+06		1.62461e+06	395271	105872	952324	1.44287e+06
PC(O-32:1)_Glycerophospholipids_Glycerophosphocholines_Diacylglycerophosphocholines_718.5747@15.61																111022
PC(O-32:2)_Glycerophospholipids_Glycerophosphocholines_Diacylglycerophosphocholines_716.5592@13.82							66502.1					70730.9				214561
PC(O-32:3)_Glycerophospholipids_Glycerophosphocholines_Diacylglycerophosphocholines_714.5370@5.14																	45575.1
PC(O-33:0)_Glycerophospholipids_Glycerophosphocholines_Diacylglycerophosphocholines_734.6055@16.38																191583
PC(O-33:1)_Glycerophospholipids_Glycerophosphocholines_Diacylglycerophosphocholines_732.5901@15.15						95397.3	132225									227835
PC(O-33:1)_Glycerophospholipids_Glycerophosphocholines_Diacylglycerophosphocholines_732.5901@15.29																99631
PC(O-33:2)_Glycerophospholipids_Glycerophosphocholines_Diacylglycerophosphocholines_730.5747@17.59																41410.3
PC(O-34:0)_Glycerophospholipids_Glycerophosphocholines_Diacylglycerophosphocholines_748.6215@17.58						374005	537081	354584	609101	303935	423072	565982	512243	304968	453105	821655									125725
PC(O-34:1)_Glycerophospholipids_Glycerophosphocholines_Diacylglycerophosphocholines_746.6060@16.15						2.9021e+06	3.65937e+06	2.68657e+06	3.79248e+06	2.32374e+06	2.92905e+06	3.80021e+06	3.74421e+06	2.40541e+06	2.64964e+06	6.19968e+06		1.13448e+06	1.12149e+06		1.61377e+06			923221	1.35044e+06
PC(O-34:2)_Glycerophospholipids_Glycerophosphocholines_Diacylglycerophosphocholines_744.5901@15.88										94276.7			164683
PC(O-34:2)_Glycerophospholipids_Glycerophosphocholines_Diacylglycerophosphocholines_744.5902@14.34						174194	325668		285653	160781	215817	395211	331903	187387	259016	600586		47185.3			122257
PC(O-34:2)_Glycerophospholipids_Glycerophosphocholines_Diacylglycerophosphocholines_744.5902@15.82						223315	336703	317459	331434	163127	290889	496931	414606		267359	722013
PC(O-34:2)_Glycerophospholipids_Glycerophosphocholines_Diacylglycerophosphocholines_744.5904@14.63							111205				36674.9
PC(O-35:1)_Glycerophospholipids_Glycerophosphocholines_Diacylglycerophosphocholines_760.6215@16.97												102434				226281
PC(O-36:1)_Glycerophospholipids_Glycerophosphocholines_Diacylglycerophosphocholines_774.6372@17.75						1.26137e+06	1.63985e+06	1.13635e+06	1.64354e+06	927809	1.29042e+06	1.63489e+06	1.4646e+06	871153	1.11861e+06	2.37697e+06		273236	249981		416701			168812	346851
PC(O-36:2)_Glycerophospholipids_Glycerophosphocholines_Diacylglycerophosphocholines_772.6146@8.02	74809.6	74171.3	59622.6	60651.2	74582.2	142450	153310	114226	162803	128583	170588	133600	147226	111560	107027	109004	223453	203503	217936	174515	188451	189646	202904	134719	237900
PC(O-36:2)_Glycerophospholipids_Glycerophosphocholines_Diacylglycerophosphocholines_772.6214@16.64									203017	99338.1		285039			75588.5	407116
PC(O-36:2)_Glycerophospholipids_Glycerophosphocholines_Diacylglycerophosphocholines_772.6214@17.48							153761	80625.2	92861.4			142808	113354			352994
PC(O-36:2)_Glycerophospholipids_Glycerophosphocholines_Diacylglycerophosphocholines_772.6216@16.24						549768	832651	482127	828618	417602	569913	771362	811247	416451	496495	1.43511e+06		69031.5			169971				210853
PC(O-36:3)_Glycerophospholipids_Glycerophosphocholines_Diacylglycerophosphocholines_770.5992@17.94										63640.8
PC(O-36:4)_Glycerophospholipids_Glycerophosphocholines_Diacylglycerophosphocholines_768.5901@14.47																65942.3
PC(O-38:4)_Glycerophospholipids_Glycerophosphocholines_Diacylglycerophosphocholines_796.6215@16.44																96526.5
PC(O-38:4)_Glycerophospholipids_Glycerophosphocholines_Diacylglycerophosphocholines_796.6219@16.51									33009.9				62354.3			61554.6
PC(O-42:2)_Glycerophospholipids_Glycerophosphocholines_Diacylglycerophosphocholines_856.7237@21.88					100362	75741.1				52094.7		85825.5	67845.6		109705	73087.2	74486.5					31458.3	97282.9
PC(O-42:6)_Glycerophospholipids_Glycerophosphocholines_Diacylglycerophosphocholines_848.6589@17.64
PC(O-44:4)_Glycerophospholipids_Glycerophosphocholines_Diacylglycerophosphocholines_880.7176@22.47								69504.5			91100.1				47577.6	95190.8
PC(O-44:5)_Glycerophospholipids_Glycerophosphocholines_Diacylglycerophosphocholines_878.7034@17.84																	70629.4		47861.5	70396	23941.8
PC(P-30:1)_Glycerophospholipids_Glycerophosphocholines_Diacylglycerophosphocholines_688.5214@6.50										90147.7
PC(P-31:1)_Glycerophospholipids_Glycerophosphocholines_Diacylglycerophosphocholines_702.5370@20.91	46389.5
PC(P-31:1)_Glycerophospholipids_Glycerophosphocholines_Diacylglycerophosphocholines_702.5372@19.33
PC(P-31:1)_Glycerophospholipids_Glycerophosphocholines_Diacylglycerophosphocholines_702.5439@15.99																125003
PC(P-33:2)_Glycerophospholipids_Glycerophosphocholines_Diacylglycerophosphocholines_728.5593@16.14
PC(P-35:2)_Glycerophospholipids_Glycerophosphocholines_Diacylglycerophosphocholines_756.5911@17.58
PE(31:3)_Glycerophospholipids_Glycerophosphoethanolamines_1-(1Z-alkenyl),2-acylglycerophosphoserines_672.4572@2.60							138528		166155	272632	296246						293993	300752	417686	270605	208801	137754	179311	90418.7
PE(33:5)_Glycerophospholipids_Glycerophosphoethanolamines_1-(1Z-alkenyl),2-acylglycerophosphoserines_696.4672@2.18							73960.4			190302	266805						158243	130302	241746	136490	98874	61549.3	97682.6
PE(O-36:5)_Glycerophospholipids_Glycerophosphoethanolamines_1Z-alkenylglycerophosphoinositols_724.5279@14.33							75563.2	61994.6					167102		61846.2	171253
PE(O-37:4)_Glycerophospholipids_Glycerophosphoethanolamines_1-alkyl,2-acylglycerophosphoinositols_740.5522@5.38
PE(O-37:4)_Glycerophospholipids_Glycerophosphoethanolamines_1-alkyl,2-acylglycerophosphoinositols_740.5557@8.75																55299.4							92127.5
PE(O-38:5)_Glycerophospholipids_Glycerophosphoethanolamines_1Z-alkenylglycerophosphoinositols_752.5631@5.75																			93810.6
PE(O-38:5)_Glycerophospholipids_Glycerophosphoethanolamines_Monoacylglycerophosphoinositols_752.5588@16.31						43516.8	84717.5		80764.8			116018	123717		81638.2	204843
PE(O-38:6)_Glycerophospholipids_Glycerophosphoethanolamines_Diacylglycerophosphoinositols_750.5409@16.12
PE(O-38:6)_Glycerophospholipids_Glycerophosphoethanolamines_Diacylglycerophosphoinositols_750.5437@14.46
PE(O-40:5)_Glycerophospholipids_Glycerophosphoethanolamines_1Z-alkenylglycerophosphoinositols_780.5941@8.19
PE(O-40:5)_Glycerophospholipids_Glycerophosphoethanolamines_Monoacylglycerophosphoinositols_780.5908@17.40
PE(O-40:6)_Glycerophospholipids_Glycerophosphoethanolamines_1Z-alkenylglycerophosphoinositols_778.5818@9.19						89675.9									97221.7					107787			121784	120820
PE(P-30:1)_Glycerophospholipids_Glycerophosphoethanolamines_Monoacylglycerophosphoglycerols_646.4864@10.15
PE(P-36:5)_Glycerophospholipids_Glycerophosphoethanolamines_Monoacylglycerophosphoglycerols_722.5120@13.09													76412.1			88526.8
PE(P-40:6)_Glycerophospholipids_Glycerophosphoethanolamines_Monoacylglycerophosphoglycerols_776.5591@15.94
PE-Cer(34:2)_Sphingolipids_Phosphosphingolipids_Vitamin D3 and derivatives_659.5133@6.82														71868.9	84045.8						75305.7
PE-Cer(34:2)_Sphingolipids_Phosphosphingolipids_Vitamin D3 and derivatives_659.5137@3.67																							102070
PE-Cer(34:2)_Sphingolipids_Phosphosphingolipids_Vitamin D3 and derivatives_675.5074@10.51	63293.3				64812
PE-Cer(36:3)_Sphingolipids_Phosphosphingolipids_Vitamin D3 and derivatives_701.5271@8.29										83956.3							104613					68166.9	119221	55793.4
PE-Cer(37:1)_Sphingolipids_Phosphosphingolipids_Vitamin D3 and derivatives_703.5751@12.17						1.65881e+06	1.27541e+06	984518	1.30644e+06	1.10833e+06	1.03365e+06	1.22054e+06	1.42643e+06	1.19235e+06	1.41663e+06	1.5093e+06	329956	814752	730407	295062	836507	345519	620658	708683	763238
PE-Cer(38:3)_Sphingolipids_Phosphosphingolipids_Vitamin D3 and derivatives_713.5574@24.10
PG(24:0)_Glycerophospholipids_Glycerophosphoglycerols_Diacylglycerophosphoserines_611.3884@25.28	74326.6	66608.7	40262.4									67956	50109.4	89540.8				65012.2						45988.4	54109.7
PG(26:1)_Glycerophospholipids_Glycerophosphoglycerols_1-alkyl,2-acylglycerophosphoserines_637.4037@20.41																229363
PG(26:1)_Glycerophospholipids_Glycerophosphoglycerols_1-alkyl,2-acylglycerophosphoserines_637.4099@23.02						27525.4										152746
PG(26:1)_Glycerophospholipids_Glycerophosphoglycerols_1-alkyl,2-acylglycerophosphoserines_637.4117@17.41																208767
PG(26:1)_Glycerophospholipids_Glycerophosphoglycerols_1-alkyl,2-acylglycerophosphoserines_637.4137@20.57
PG(26:1)_Glycerophospholipids_Glycerophosphoglycerols_Diacylglycerophosphoserines_637.4079@25.35												32068
PG(28:0)_Glycerophospholipids_Glycerophosphoglycerols_1-alkyl,2-acylglycerophosphoserines_667.4510@2.19							89705.8		108598	300681	274469						184340	157970	363427	241416	174501	81249.9			77642.2
PG(31:1)_Glycerophospholipids_Glycerophosphoglycerols_1-alkyl,2-acylglycerophosphoserines_707.4912@19.45				114264
PG(31:1)_Glycerophospholipids_Glycerophosphoglycerols_1-alkyl,2-acylglycerophosphoserines_707.4914@14.33
PG(31:1)_Glycerophospholipids_Glycerophosphoglycerols_1-alkyl,2-acylglycerophosphoserines_707.4914@14.98																						107311			124831
PG(31:1)_Glycerophospholipids_Glycerophosphoglycerols_1-alkyl,2-acylglycerophosphoserines_707.4920@20.38																		47099.3
PG(31:1)_Glycerophospholipids_Glycerophosphoglycerols_Diacylglycerophosphoserines_707.4910@24.81					58787.4									30996.7
PG(31:1)_Glycerophospholipids_Glycerophosphoglycerols_Diacylglycerophosphoserines_707.4923@23.63																	70541
PG(33:5)_Glycerophospholipids_Glycerophosphoglycerols_1-alkyl,2-acylglycerophosphoserines_727.4502@2.40																		41424.1					40543.1	35381.4	81058.5
PG(34:3)_Glycerophospholipids_Glycerophosphoglycerols_1-alkyl,2-acylglycerophosphoserines_745.4998@2.51							78687.4		82747.4	225781	246696						218732	197789	337546	215216	152232
PG(38:7)_Glycerophospholipids_Glycerophosphoglycerols_Diacylglycerophosphoserines_793.4977@25.36
PG(39:3)_Glycerophospholipids_Glycerophosphoglycerols_1-alkyl,2-acylglycerophosphoserines_815.5775@20.70			24041.1																						21783.5
PG(39:4)_Glycerophospholipids_Glycerophosphoglycerols_1-alkyl,2-acylglycerophosphoserines_813.5581@14.81									69143.3					63212.5	110955		82649.2			52462.8		126118
PG(O-32:0)_Glycerophospholipids_Glycerophosphoglycerols_1-alkyl,2-acylglycerophosphoserines_709.5412@19.62
PG(O-34:0)_Glycerophospholipids_Glycerophosphoglycerols_1-alkyl,2-acylglycerophosphoserines_737.5725@20.85	186735				110220						146442				188765	116754					125313		131587
PG(O-34:0)_Glycerophospholipids_Glycerophosphoglycerols_1-alkyl,2-acylglycerophosphoserines_737.5726@20.60
PG(O-36:2)_Glycerophospholipids_Glycerophosphoglycerols_1-alkyl,2-acylglycerophosphoserines_761.5695@18.89	118310	65722			72056.8				86931.9	68711.2		90107.1		68766			94937.7	148695	144662	99220.3	102266	106658	111364		76786
PG(O-38:2)_Glycerophospholipids_Glycerophosphoglycerols_1-alkyl,2-acylglycerophosphoserines_789.6004@19.90																	47406.2
PG(O-38:3)_Glycerophospholipids_Glycerophosphoglycerols_1-alkyl,2-acylglycerophosphoserines_787.5852@18.97						109059	104449		98912.7	82656.1									77350.4		104403		90717.4	52235.7
PG(O-40:10)_Glycerophospholipids_Glycerophosphoglycerols_Diacylglycerophosphoserines_823.6789@22.36
PG(O-40:4)_Glycerophospholipids_Glycerophosphoglycerols_1-alkyl,2-acylglycerophosphoserines_813.6006@19.03							68042.1		102672	102701	98310.6		73457.4						25488.8		50578.1		56246.5	65669.9
PG(O-40:9)_Glycerophospholipids_Glycerophosphoglycerols_Diacylglycerophosphoserines_791.5603@7.00	57165.9	66453.3	55085.7				76972.2	77883.1	64586.2	73852.9	67977.5		70886.4	64605.7	67190.9		120415	97797.2	124638	111478	103086	72762.8	119619	83559.5	93767.5
PG(O-42:0)_Glycerophospholipids_Glycerophosphoglycerols_1-alkyl,2-acylglycerophosphoserines_849.6946@22.48																		30873.1
PG(P-42:6)_Glycerophospholipids_Glycerophosphoglycerols_1-alkyl,2-acylglycerophosphoserines_835.5864@6.94										23962.2
PI(41:6)_Glycerophospholipids_Glycerophosphoinositols_Diacylglycerophosphoserines_925.5758@25.35														27806.9
PI(42:6)_Glycerophospholipids_Glycerophosphoinositols_Diacylglycerophosphoserines_939.5963@8.67																	86425.9		50776	39209.9
PI(O-29:0)_Glycerophospholipids_Glycerophosphoinositols_Diacylglycerophosphoserines_755.5037@2.12									35384.7	118716	148799						95827.1	92731.9	153672	65652.9
PI(O-30:0)_Glycerophospholipids_Glycerophosphoinositols_Diacylglycerophosphoserines_769.5271@24.14		94445.1					82068.4	89821.1	52159.6	79352.4	53959.5	59048.3					96637.1			110894	70214.9	48515.3
PI-Cer(30:0)_Sphingolipids_Phosphosphingolipids_Vitamin D3 and derivatives_770.5127@2.08										83052.7
PI-Cer(34:1)_Sphingolipids_Phosphosphingolipids_Vitamin D3 and derivatives_780.5387@10.29								38223.8	123588	131147	65988			96077.3		46029.2
PI-Cer(36:1)_Sphingolipids_Phosphosphingolipids_Vitamin D3 and derivatives_808.5702@12.21						100197				164520	108165		193863	88646.6	92559.7
PI-Cer(44:0)_Sphingolipids_Phosphosphingolipids_Vitamin D3 and derivatives_1100.7581@23.80																		44122.9
PI-Cer(44:0)_Sphingolipids_Phosphosphingolipids_Vitamin D3 and derivatives_1100.7591@25.22
PI-Cer(44:0)_Sphingolipids_Phosphosphingolipids_Vitamin D3 and derivatives_1100.7596@22.97
PI-Cer(44:0)_Sphingolipids_Phosphosphingolipids_Vitamin D3 and derivatives_1100.7604@24.72
PI-Cer(44:0)_Sphingolipids_Phosphosphingolipids_Vitamin D3 and derivatives_1116.7442@25.23										52494.1
PS(25:0)_Glycerophospholipids_Glycerophosphoserines_Anthocyanidins_638.4054@25.35
PS(26:0)_Glycerophospholipids_Glycerophosphoserines_Anthocyanidins_652.4127@25.35
PS(31:1)_Glycerophospholipids_Glycerophosphoserines_Diphenyl ethers, biphenyls, dibenzyls and stilbenes_720.4863@3.11										41071.5
PS(31:1)_Glycerophospholipids_Glycerophosphoserines_Diphenyl ethers, biphenyls, dibenzyls and stilbenes_720.4868@3.02										77330							57614.6			53045.9
PS(32:4)_Glycerophospholipids_Glycerophosphoserines_Anthocyanidins_728.4569@25.35							26530.9
PS(33:0)_Glycerophospholipids_Glycerophosphoserines_Anthocyanidins_750.5218@14.30						42068.8								74628.2	90171	74514.6									75281.4
PS(33:0)_Glycerophospholipids_Glycerophosphoserines_Anthocyanidins_750.5218@14.46															44004.4
PS(34:2)_Glycerophospholipids_Glycerophosphoserines_Depsides and depsidones_760.5100@2.50										129520	125995							102569	145490
PS(36:1)_Glycerophospholipids_Glycerophosphoserines_Anthocyanidins_790.5598@15.29
PS(36:5)_Glycerophospholipids_Glycerophosphoserines_Anthocyanidins_782.4905@25.33													31226.2	36895.8
PS(37:0)_Glycerophospholipids_Glycerophosphoserines_Oxidized glycerophosphoserines_806.5838@2.39					61513.6	79023	90264.3	90373.6	134645	103237	126943	97716.6	1.34979e+06		578402		173123	120492	101769	286938	113432	100683	226506	82685.1	113315
PS(37:3)_Glycerophospholipids_Glycerophosphoserines_Diphenyl ethers, biphenyls, dibenzyls and stilbenes_800.5486@2.81																			97284.3
PS(38:0)_Glycerophospholipids_Glycerophosphoserines_Depsides and depsidones_820.5995@2.69
PS(38:0)_Glycerophospholipids_Glycerophosphoserines_Diphenyl ethers, biphenyls, dibenzyls and stilbenes_820.6000@2.89													60125.4				46334.1	54970.5	65486.3	40630.9
PS(39:0)_Glycerophospholipids_Glycerophosphoserines_Diphenylmethanes, acylphloroglucinols and benzophenones_834.6150@3.18
PS(39:0)_Glycerophospholipids_Glycerophosphoserines_Diphenylmethanes, acylphloroglucinols and benzophenones_834.6151@3.29						253437			233663	234671	172824	209813	192554	292285	255367	195724	255172	298220	271529	230760	285859	205371		187707	240513
PS(40:0)_Glycerophospholipids_Glycerophosphoserines_Diphenylmethanes, acylphloroglucinols and benzophenones_848.6305@4.02														108422	92257.7								83243.6
PS(40:0)_Glycerophospholipids_Glycerophosphoserines_Diphenylmethanes, acylphloroglucinols and benzophenones_848.6307@3.84										94573.8	74836.3	78949	99660	88988.2	70661	80957.2	98225.2	121347	90984.9		121668	86992.8	133026	107537	113698
PS(40:5)_Glycerophospholipids_Glycerophosphoserines_Anthocyanidins_838.5593@14.54
PS(40:6)_Glycerophospholipids_Glycerophosphoserines_Anthocyanidins_836.5442@13.42
PS(41:4)_Glycerophospholipids_Glycerophosphoserines_Depsides and depsidones_854.5838@2.40	58085.2	68149.7		62863.8	67897	147502	176979	153572	143904	145782	173129	167279	146862	161672	127895	126229	224745	209935	252009	225038	208502	172492	184640	169075	230399
PS(41:6)_Glycerophospholipids_Glycerophosphoserines_Anthocyanidins_850.5542@14.77																67891.1
PS(42:0)_Glycerophospholipids_Glycerophosphoserines_Anthocyanidins_876.6621@6.22								39274.2			71248.5	48739.5		58671.3			77579.9	104280	121761	85227.8	102012	80981.9	109080	79060.3	112258
PS(42:2)_Glycerophospholipids_Glycerophosphoserines_Monocyclic aromatic polyketides_872.6310@5.19																	91548.7	98393.1	100703	96466.6	49109.5	63733.7		31200.1
PS(42:5)_Glycerophospholipids_Glycerophosphoserines_Depsides and depsidones_866.5876@2.68																			108505	54413.6
PS(44:0)_Glycerophospholipids_Glycerophosphoserines_Anthocyanidins_904.6933@7.79	58122.7		76214.5	84290.7	93795.7	156522	165847	147254	148970	148646	173733	127018	148535	129697	131089	138553	207380	189269	236222	223065	207512	174367	200796	177098	261600
PS(O-30:0)_Glycerophospholipids_Glycerophosphoserines_Oxidized glycerophosphocholines_694.4961@14.34
PS(O-31:0)_Glycerophospholipids_Glycerophosphoserines_Oxidized glycerophosphates_708.5118@12.64																	30225.5
PS(O-31:0)_Glycerophospholipids_Glycerophosphoserines_Oxidized glycerophosphates_708.5127@11.85
PS(O-31:0)_Glycerophospholipids_Glycerophosphoserines_Oxidized glycerophosphocholines_708.5118@14.34
PS(O-33:0)_Glycerophospholipids_Glycerophosphoserines_Oxidized glycerophosphocholines_736.5430@14.34
PS(O-33:0)_Glycerophospholipids_Glycerophosphoserines_Oxidized glycerophosphocholines_736.5430@22.52
PS(O-33:0)_Glycerophospholipids_Glycerophosphoserines_Oxidized glycerophosphocholines_736.5431@20.84																							148378
PS(O-33:0)_Glycerophospholipids_Glycerophosphoserines_Oxidized glycerophosphocholines_736.5437@21.59																				110237
PS(O-33:0)_Glycerophospholipids_Glycerophosphoserines_Oxidized glycerophosphoglycerols_736.5436@23.68									106279									98827.5
PS(O-33:0)_Glycerophospholipids_Glycerophosphoserines_Oxidized glycerophosphoinositols_736.5433@24.53						118603	73822.6
PS(O-33:0)_Glycerophospholipids_Glycerophosphoserines_Oxidized glycerophosphoserines_736.5430@25.21
PS(O-34:1)_Glycerophospholipids_Glycerophosphoserines_Monoacylglycerophosphoserines_748.5420@2.07			81174.6								75931.8		1.00288e+06		368923		138589	79986.7	111827	190302	81182		145679
PS(O-35:1)_Glycerophospholipids_Glycerophosphoserines_Monoalkylglycerophosphoserines_762.5576@2.41	146846	139157	116005	128131	116560	186294	188275	158578	239297	202908	238932	172483	2.49576e+06	148023	1.0954e+06	152149	334722	225311	245554	569327	242797	197982	436345	203771	248042
PS(O-36:1)_Glycerophospholipids_Glycerophosphoserines_Monoalkylglycerophosphoserines_776.5733@2.72
PS(O-36:1)_Glycerophospholipids_Glycerophosphoserines_Monoalkylglycerophosphoserines_776.5733@2.91							74940.6		82291.2				127635		76165.7		141999	147536	134525	124397	95465	88483.6	407277	89675.8	132611
PS(O-37:1)_Glycerophospholipids_Glycerophosphoserines_Monoalkylglycerophosphoserines_790.5889@3.22						412849			454273				414844	414854	417070		428348		428901		399779	407920	436208		407430
PS(O-37:1)_Glycerophospholipids_Glycerophosphoserines_Monoalkylglycerophosphoserines_790.5889@3.32
PS(O-37:1)_Glycerophospholipids_Glycerophosphoserines_Monoalkylglycerophosphoserines_790.5893@3.54																			36095.8				63848.2
PS(O-38:1)_Glycerophospholipids_Glycerophosphoserines_Oxidized glycerophosphates_804.6045@4.06						196710	193946	177389		192016	215679	169571	167579	216277	204966	209648	197281		216314	224914	220381	233756	226933	201435	202514
PS(O-38:1)_Glycerophospholipids_Glycerophosphoserines_Oxidized glycerophosphates_804.6045@4.32																							228072
PS(O-38:1)_Glycerophospholipids_Glycerophosphoserines_Oxidized glycerophosphates_804.6046@3.88
PS(O-40:1)_Glycerophospholipids_Glycerophosphoserines_Oxidized glycerophosphates_832.6359@6.29						57553.7			78864.9	64624.6	93505.3		82729.4	71871.6			134161	113225	139203	123097	137448	99593.7	132094	122860	151128
PS(O-40:3)_Glycerophospholipids_Glycerophosphoserines_Oxidized glycerophosphates_828.6046@5.25
PS(O-40:6)_Glycerophospholipids_Glycerophosphoserines_Monoalkylglycerophosphoserines_822.5608@2.75										71649.3									116953
PS(O-42:1)_Glycerophospholipids_Glycerophosphoserines_Oxidized glycerophosphates_860.6672@7.86											184184						198984	206067	246035	191509	210564		202802	162023	262242
PS(P-34:4)_Glycerophospholipids_Glycerophosphoserines_Diacylglycerophosphoserines_740.4937@2.12							46514			81200.9	105552							105214	137417
PS(P-42:2)_Glycerophospholipids_Glycerophosphoserines_Monoacylglycerophosphoserines_856.6394@10.09
SM(34:0)_Sphingolipids_Phosphosphingolipids_Vitamin D3 and derivatives_705.5906@12.98																120279
SM(36:3)_Sphingolipids_Phosphosphingolipids_Vitamin D3 and derivatives_727.5789@18.40																				36873.8
SM(42:2)_Sphingolipids_Phosphosphingolipids_Vitamin D3 and derivatives_813.6848@17.78
TG(38:0)_Glycerolipids_Triradylglycerols_Triacylglycerols_684.6138@19.48																	90344.8					54302.9
TG(38:0)_Glycerolipids_Triradylglycerols_Triacylglycerols_684.6138@20.36					137486					144662					156683							148630	176327		165766
TG(38:0)_Glycerolipids_Triradylglycerols_Triacylglycerols_684.6139@20.21	162804						173536	157633			183385		196652											189036
TG(38:0)_Glycerolipids_Triradylglycerols_Triacylglycerols_684.6141@19.70
TG(38:0)_Glycerolipids_Triradylglycerols_Triacylglycerols_684.6141@20.52
TG(38:0)_Glycerolipids_Triradylglycerols_Triacylglycerols_684.6141@20.73
TG(38:0)_Glycerolipids_Triradylglycerols_Triacylglycerols_684.6150@21.73																			34811.6
TG(38:0)_Glycerolipids_Triradylglycerols_Triacylglycerols_684.6153@22.24																			38423
TG(38:1)_Glycerolipids_Triradylglycerols_Triacylglycerols_682.5984@19.75
TG(40:0)_Glycerolipids_Triradylglycerols_Triacylglycerols_712.6451@21.64																								107561	123606
TG(40:0)_Glycerolipids_Triradylglycerols_Triacylglycerols_712.6453@21.44
TG(40:0)_Glycerolipids_Triradylglycerols_Triacylglycerols_712.6454@20.73																							142803
TG(40:0)_Glycerolipids_Triradylglycerols_Triacylglycerols_712.6454@21.18
TG(40:0)_Glycerolipids_Triradylglycerols_Triacylglycerols_712.6454@21.28
TG(40:0)_Glycerolipids_Triradylglycerols_Triacylglycerols_712.6455@20.53
TG(40:1)_Glycerolipids_Triradylglycerols_Triacylglycerols_710.6296@19.74	44445.7	66185.6									66167.3								90182.9		79731.7			68582.4
TG(40:1)_Glycerolipids_Triradylglycerols_Triacylglycerols_710.6297@20.57
TG(40:1)_Glycerolipids_Triradylglycerols_Triacylglycerols_710.6299@20.78	102918										103141
TG(40:2)_Glycerolipids_Triradylglycerols_Triacylglycerols_691.5850@19.35
TG(42:0)_Glycerolipids_Triradylglycerols_Triacylglycerols_740.6765@22.00
TG(42:0)_Glycerolipids_Triradylglycerols_Triacylglycerols_740.6766@21.24			46294.6							105765	107018						117405	126126			136707		135751
TG(42:0)_Glycerolipids_Triradylglycerols_Triacylglycerols_740.6766@21.63																					51702
TG(42:1)_Glycerolipids_Triradylglycerols_Triacylglycerols_738.6609@20.51																				33622.4
TG(42:1)_Glycerolipids_Triradylglycerols_Triacylglycerols_738.6611@21.33
TG(42:1)_Glycerolipids_Triradylglycerols_Triacylglycerols_738.6612@21.47								108501										113676				94620.7	83081.2
TG(42:3)_Glycerolipids_Triradylglycerols_Triacylglycerols_717.6006@21.45
TG(42:3)_Glycerolipids_Triradylglycerols_Triacylglycerols_717.6007@21.19
TG(42:4)_Glycerolipids_Triradylglycerols_Triacylglycerols_715.5851@20.78
TG(42:4)_Glycerolipids_Triradylglycerols_Triacylglycerols_715.5852@20.57
TG(42:4)_Glycerolipids_Triradylglycerols_Triacylglycerols_732.6173@20.60
TG(42:4)_Glycerolipids_Triradylglycerols_Triacylglycerols_732.6177@20.82											47516
TG(43:0)_Glycerolipids_Triradylglycerols_Triacylglycerols_754.6922@22.16
TG(43:0)_Glycerolipids_Triradylglycerols_Triacylglycerols_754.6922@22.33
TG(43:1)_Glycerolipids_Triradylglycerols_Diacylglycerophosphates_752.6719@25.34							22634.1							27007.1
TG(43:3)_Glycerolipids_Triradylglycerols_Triacylglycerols_731.6168@21.57
TG(44:0)_Glycerolipids_Triradylglycerols_Triacylglycerols_768.7078@22.55
TG(44:0)_Glycerolipids_Triradylglycerols_Triacylglycerols_768.7078@22.73
TG(44:0)_Glycerolipids_Triradylglycerols_Triacylglycerols_768.7080@22.38			128185						124244			159355										141699
TG(44:1)_Glycerolipids_Triradylglycerols_Triacylglycerols_766.6918@21.31									30500.8
TG(44:1)_Glycerolipids_Triradylglycerols_Triacylglycerols_766.6922@22.08
TG(44:2)_Glycerolipids_Triradylglycerols_Triacylglycerols_764.6768@21.45
TG(44:3)_Glycerolipids_Triradylglycerols_Triacylglycerols_745.6319@22.00
TG(44:4)_Glycerolipids_Triradylglycerols_Triacylglycerols_743.6162@21.32
TG(44:4)_Glycerolipids_Triradylglycerols_Triacylglycerols_760.6486@20.60
TG(44:5)_Glycerolipids_Triradylglycerols_Triacylglycerols_741.6009@20.61									73539.2																51059.8
TG(45:0)_Glycerolipids_Triradylglycerols_Triacylglycerols_782.7234@22.95
TG(45:0)_Glycerolipids_Triradylglycerols_Triacylglycerols_782.7234@23.13
TG(45:1)_Glycerolipids_Triradylglycerols_Triacylglycerols_780.7078@22.33
TG(45:1)_Glycerolipids_Triradylglycerols_Triacylglycerols_780.7079@22.47
TG(45:2)_Glycerolipids_Triradylglycerols_Triacylglycerols_778.6923@21.86					82095.1									77925.8						121323				101369
TG(45:3)_Glycerolipids_Triradylglycerols_Triacylglycerols_759.6475@22.17
TG(45:3)_Glycerolipids_Triradylglycerols_Triacylglycerols_759.6476@22.32
TG(45:4)_Glycerolipids_Triradylglycerols_Triacylglycerols_757.6322@21.71									65966.7
TG(45:4)_Glycerolipids_Triradylglycerols_Triacylglycerols_757.6379@18.16									19728.4
TG(46:0)_Glycerolipids_Triradylglycerols_Triacylglycerols_796.7391@23.35
TG(46:0)_Glycerolipids_Triradylglycerols_Triacylglycerols_796.7391@23.58
TG(46:0)_Glycerolipids_Triradylglycerols_Triacylglycerols_796.7400@22.50																				68746.5
TG(46:1)_Glycerolipids_Triradylglycerols_Triacylglycerols_794.7234@22.86
TG(46:2)_Glycerolipids_Triradylglycerols_Triacylglycerols_792.7079@22.24
TG(46:3)_Glycerolipids_Triradylglycerols_Triacylglycerols_773.6631@22.55
TG(46:3)_Glycerolipids_Triradylglycerols_Triacylglycerols_773.6631@22.73
TG(46:3)_Glycerolipids_Triradylglycerols_Triacylglycerols_773.6632@22.37																111371		85961.2		125056
TG(46:4)_Glycerolipids_Triradylglycerols_Triacylglycerols_771.6475@22.08
TG(46:5)_Glycerolipids_Triradylglycerols_Triacylglycerols_769.6319@21.45			117713	135089	158784				221992		127196	161886			89189	171701			151254	144267		174082	164801	139674	176840
TG(47:0)_Glycerolipids_Triradylglycerols_Triacylglycerols_810.7540@22.95												127169			89677.6							123559		85962.6
TG(47:0)_Glycerolipids_Triradylglycerols_Triacylglycerols_810.7547@23.84
TG(47:0)_Glycerolipids_Triradylglycerols_Triacylglycerols_810.7547@24.06
TG(47:0)_Glycerolipids_Triradylglycerols_Triacylglycerols_810.7548@23.65
TG(47:1)_Glycerolipids_Triradylglycerols_Triacylglycerols_808.7390@23.12
TG(47:1)_Glycerolipids_Triradylglycerols_Triacylglycerols_808.7391@23.29
TG(47:2)_Glycerolipids_Triradylglycerols_Triacylglycerols_806.7235@22.61
TG(47:2)_Glycerolipids_Triradylglycerols_Triacylglycerols_806.7239@22.60						544729													533494	634888			616635
TG(47:3)_Glycerolipids_Triradylglycerols_Triacylglycerols_787.6784@22.76					66503.9		110710								100347
TG(47:3)_Glycerolipids_Triradylglycerols_Triacylglycerols_787.6787@22.94
TG(47:3)_Glycerolipids_Triradylglycerols_Triacylglycerols_787.6788@23.12
TG(47:3)_Glycerolipids_Triradylglycerols_Triacylglycerols_804.7078@22.00																							46417.3		38976.8
TG(47:4)_Glycerolipids_Triradylglycerols_Triacylglycerols_785.6632@22.47
TG(47:4)_Glycerolipids_Triradylglycerols_Triacylglycerols_785.6633@22.33
TG(47:5)_Glycerolipids_Triradylglycerols_Triacylglycerols_783.6477@21.86
TG(48:0)_Glycerolipids_Triradylglycerols_1-alkyl,2-acylglycerophosphates_824.7699@24.33					362276							397493			414843	362360						390682			424284
TG(48:0)_Glycerolipids_Triradylglycerols_1-alkyl,2-acylglycerophosphates_824.7703@24.33
TG(48:0)_Glycerolipids_Triradylglycerols_1-alkyl,2-acylglycerophosphates_824.7704@24.59
TG(48:1)_Glycerolipids_Triradylglycerols_Triacylglycerols_822.7546@23.64
TG(48:1)_Glycerolipids_Triradylglycerols_Triacylglycerols_822.7548@23.75
TG(48:2)_Glycerolipids_Triradylglycerols_Triacylglycerols_820.7391@23.00
TG(48:3)_Glycerolipids_Triradylglycerols_Triacylglycerols_801.6945@23.38
TG(48:3)_Glycerolipids_Triradylglycerols_Triacylglycerols_801.6945@23.58
TG(48:3)_Glycerolipids_Triradylglycerols_Triacylglycerols_818.7235@22.37
TG(48:4)_Glycerolipids_Triradylglycerols_Triacylglycerols_799.6788@22.87
TG(48:5)_Glycerolipids_Triradylglycerols_Triacylglycerols_797.6632@22.24
TG(48:6)_Glycerolipids_Triradylglycerols_Triacylglycerols_795.6476@21.60									95734.8										69907.2		74846.2
TG(49:0)_Glycerolipids_Triradylglycerols_Diacylglycerophosphates_838.7859@24.89
TG(49:0)_Glycerolipids_Triradylglycerols_Diacylglycerophosphates_838.7860@25.15
TG(49:1)_Glycerolipids_Triradylglycerols_Triacylglycerols_836.7703@23.92						216767	277641			372545	399660	226340						204918
TG(49:1)_Glycerolipids_Triradylglycerols_Triacylglycerols_836.7704@24.13
TG(49:2)_Glycerolipids_Triradylglycerols_Triacylglycerols_834.7542@23.54	2.77798e+06	2.62308e+06	2.49774e+06	2.67051e+06	2.79905e+06	2.31543e+06	2.33086e+06	2.43335e+06	2.7737e+06	2.50092e+06	2.32486e+06	2.42107e+06	2.30121e+06	2.29728e+06	2.0064e+06	2.27691e+06	1.99697e+06	1.99206e+06	2.08682e+06	1.84571e+06	2.01614e+06	2.08665e+06	2.27038e+06	2.07825e+06	2.26574e+06
TG(49:2)_Glycerolipids_Triradylglycerols_Triacylglycerols_834.7544@23.36			316374				483927	435855	604230	422048			366606	359468	521150						481011	498052	280352	449961
TG(49:2)_Glycerolipids_Triradylglycerols_Triacylglycerols_834.7548@23.23									350511							461821
TG(49:3)_Glycerolipids_Triradylglycerols_Triacylglycerols_815.7101@24.06
TG(49:3)_Glycerolipids_Triradylglycerols_Triacylglycerols_815.7102@23.84
TG(49:3)_Glycerolipids_Triradylglycerols_Triacylglycerols_832.7393@22.72					119497	82110.2	70456.5	120855	76819.5	114735	57988.1	114096						86411.1	80107.4	78211.1		104513
TG(49:4)_Glycerolipids_Triradylglycerols_Triacylglycerols_813.6944@23.14
TG(49:4)_Glycerolipids_Triradylglycerols_Triacylglycerols_813.6944@23.29
TG(49:5)_Glycerolipids_Triradylglycerols_Triacylglycerols_811.6788@22.61
TG(49:6)_Glycerolipids_Triradylglycerols_Triacylglycerols_809.6624@21.99
TG(50:0)_Glycerolipids_Triradylglycerols_1-alkyl,2-acylglycerophosphates_852.7941@24.65																				211263
TG(50:0)_Glycerolipids_Triradylglycerols_1-alkyl,2-acylglycerophosphates_852.8017@24.58
TG(50:0)_Glycerolipids_Triradylglycerols_Triacylglycerols_852.8026@19.50	57119.2											172858					63494.5		73717.7				80664.1	72729.1
TG(50:0)_Glycerolipids_Triradylglycerols_Triacylglycerols_852.8030@24.20						13465.7							56257.5
TG(50:0)_Glycerolipids_Triradylglycerols_Triacylglycerols_852.8034@19.33
TG(50:1)_Glycerolipids_Triradylglycerols_1-alkyl,2-acylglycerophosphates_850.7860@24.64
TG(50:1)_Glycerolipids_Triradylglycerols_Triacylglycerols_850.7800@23.84						110052		58607	66863.5	56386.5					75594	22515.9			57600.6	51515.1	72367.9				61393
TG(50:2)_Glycerolipids_Triradylglycerols_Triacylglycerols_848.7704@23.70	261245	392767		328878		1.09446e+06	1.15574e+06	1.54776e+06	1.35877e+06	1.15807e+06	2.14938e+06	1.34829e+06	802471	890683	1.12885e+06	2.10989e+06		1.01978e+06	719752	312387	1.20262e+06	718851	605244	853198	1.13595e+06
TG(50:2)_Glycerolipids_Triradylglycerols_Triacylglycerols_848.7706@23.86
TG(50:3)_Glycerolipids_Triradylglycerols_1-alkyl,2-acylglycerophosphates_829.7257@24.59
TG(50:3)_Glycerolipids_Triradylglycerols_1-alkyl,2-acylglycerophosphates_829.7258@24.36
TG(50:3)_Glycerolipids_Triradylglycerols_Triacylglycerols_846.7544@22.89										307258	641900	353883	185266	339233	356341	783251					475740	255774		183502	402299
TG(50:3)_Glycerolipids_Triradylglycerols_Triacylglycerols_846.7548@23.09
TG(50:3)_Glycerolipids_Triradylglycerols_Triacylglycerols_846.7549@22.37			38069.1						50245.6								30757.5						50238.3
TG(50:4)_Glycerolipids_Triradylglycerols_Triacylglycerols_827.7101@23.65
TG(50:4)_Glycerolipids_Triradylglycerols_Triacylglycerols_827.7101@23.75
TG(50:5)_Glycerolipids_Triradylglycerols_Triacylglycerols_825.6944@22.98
TG(50:5)_Glycerolipids_Triradylglycerols_Triacylglycerols_825.6944@23.00
TG(51:1)_Glycerolipids_Triradylglycerols_Diacylglycerophosphates_864.8012@25.14									54562.5		42934.9			54113.9	46237.5	50992
TG(51:1)_Glycerolipids_Triradylglycerols_Diacylglycerophosphates_864.8019@24.97					46008.8									90937.3
TG(51:2)_Glycerolipids_Triradylglycerols_1-alkyl,2-acylglycerophosphates_862.7867@24.37
TG(51:2)_Glycerolipids_Triradylglycerols_Triacylglycerols_862.7864@24.18						376498	328824	382928	468129	301749	551917	352586	320007	335179	369222	629928		278560	363765		283629	348024		213466
TG(51:3)_Glycerolipids_Triradylglycerols_Diacylglycerophosphates_843.7414@25.15
TG(51:3)_Glycerolipids_Triradylglycerols_Diacylglycerophosphates_843.7415@24.89
TG(51:3)_Glycerolipids_Triradylglycerols_Triacylglycerols_860.7689@23.64											71332.7
TG(51:3)_Glycerolipids_Triradylglycerols_Triacylglycerols_860.7700@23.29					5842.85		103661		80243.9		184528				81331.8	154214	25244.5								107455
TG(51:4)_Glycerolipids_Triradylglycerols_Triacylglycerols_841.7258@24.13
TG(51:4)_Glycerolipids_Triradylglycerols_Triacylglycerols_841.7259@24.04
TG(51:5)_Glycerolipids_Triradylglycerols_Triacylglycerols_839.7102@23.38
TG(51:6)_Glycerolipids_Triradylglycerols_Triacylglycerols_837.6944@22.72			94112.1	117442			96330.6	113414		126862		174254						89022.2		114241	102051	111723	127278
TG(52:0)_Glycerolipids_Triradylglycerols_Diacylglycerophosphates_880.8249@25.21
TG(52:0)_Glycerolipids_Triradylglycerols_Triacylglycerols_880.8263@22.89								71770.2
TG(52:0)_Glycerolipids_Triradylglycerols_Triacylglycerols_880.8314@22.32
TG(52:1)_Glycerolipids_Triradylglycerols_1-alkyl,2-acylglycerophosphates_878.8171@24.64
TG(52:1)_Glycerolipids_Triradylglycerols_Triacylglycerols_878.8174@19.62
TG(52:2)_Glycerolipids_Triradylglycerols_Diacylglycerophosphates_876.8012@24.69
TG(52:3)_Glycerolipids_Triradylglycerols_1-(1Z-alkenyl),2-acylglycerophosphates_874.7859@24.29												250180				231232					210064				165791
TG(52:3)_Glycerolipids_Triradylglycerols_1-alkyl,2-acylglycerophosphates_874.7868@24.42						98400.7		86498.7												51753.5	119331
TG(52:3)_Glycerolipids_Triradylglycerols_Diacylglycerophosphates_874.7861@24.98			45822.9				28280															36586.8
TG(52:3)_Glycerolipids_Triradylglycerols_Triacylglycerols_857.7573@19.45
TG(52:3)_Glycerolipids_Triradylglycerols_Triacylglycerols_874.7847@21.64																							48313.4
TG(52:3)_Glycerolipids_Triradylglycerols_Triacylglycerols_874.7861@23.73							978840	1.26168e+06	1.0778e+06	836815	1.70784e+06	954160	697399	766012	979494	1.89101e+06		912245	642427		1.04459e+06	507077	288006	521719	917279
TG(52:3)_Glycerolipids_Triradylglycerols_Triacylglycerols_874.7862@22.91								155021	145987		152196	135403		120570		200939		200511			285174				184723
TG(52:3)_Glycerolipids_Triradylglycerols_Triacylglycerols_874.7862@23.09															131723			133314
TG(52:3)_Glycerolipids_Triradylglycerols_Triacylglycerols_874.7862@23.92
TG(52:3)_Glycerolipids_Triradylglycerols_Triacylglycerols_874.7884@20.40																37902
TG(52:4)_Glycerolipids_Triradylglycerols_1-alkyl,2-acylglycerophosphates_855.7414@24.64
TG(52:4)_Glycerolipids_Triradylglycerols_Triacylglycerols_872.7705@23.25
TG(52:5)_Glycerolipids_Triradylglycerols_Diacylglycerophosphates_870.7614@24.94											53746.4
TG(52:5)_Glycerolipids_Triradylglycerols_Triacylglycerols_853.7257@23.69						941559	959177	1.52828e+06	1.33949e+06	838166	1.97132e+06	1.2262e+06		796245	1.09164e+06	1.85524e+06		1.25086e+06	864148		1.15783e+06				815629
TG(52:5)_Glycerolipids_Triradylglycerols_Triacylglycerols_853.7257@23.86
TG(52:5)_Glycerolipids_Triradylglycerols_Triacylglycerols_853.7258@24.14	163596				163229	188822	127980				159300				242198	159103		217520		236833	187500		139968	193507	221628
TG(52:5)_Glycerolipids_Triradylglycerols_Triacylglycerols_870.7550@22.71													74887.3
TG(52:6)_Glycerolipids_Triradylglycerols_Triacylglycerols_851.7099@22.90						416078	483623	478740	464918	399357	789004	368211	387877	292967	372545	719327		450238	466256		504766			272292	352889
TG(52:6)_Glycerolipids_Triradylglycerols_Triacylglycerols_851.7102@23.05
TG(53:1)_Glycerolipids_Triradylglycerols_Diacylglycerophosphates_875.8101@25.26
TG(53:3)_Glycerolipids_Triradylglycerols_Triacylglycerols_871.7741@21.28																								26948.8
TG(53:3)_Glycerolipids_Triradylglycerols_Triacylglycerols_888.8015@24.22								201465		108174	219536		92251.2			272308									63529.3
TG(53:4)_Glycerolipids_Triradylglycerols_Diacylglycerophosphates_869.7569@24.94							33988.6			38541.9					64413.9
TG(53:4)_Glycerolipids_Triradylglycerols_Diacylglycerophosphates_869.7571@25.16							50139.3	55115.7										63597.2				109456
TG(53:5)_Glycerolipids_Triradylglycerols_Triacylglycerols_867.7415@24.23						346686	331261	448959	445949	375878	545540	390901	338634	302892	347470	559423			322931		362784	285485		239443	296427
TG(53:6)_Glycerolipids_Triradylglycerols_Triacylglycerols_865.7258@23.31								74911.9	94805.5		173538	50577.2				180605	11359.1				53188.4
TG(53:7)_Glycerolipids_Triradylglycerols_Triacylglycerols_880.7455@24.13				38694.4		79563.5	82585.4
TG(54:1)_Glycerolipids_Triradylglycerols_Triacylglycerols_906.8487@22.39
TG(54:12)_Glycerolipids_Triradylglycerols_Triacylglycerols_867.6582@8.95																		36180.8
TG(54:2)_Glycerolipids_Triradylglycerols_1-alkyl,2-acylglycerophosphates_904.8319@24.69	111657	194438				263684	211555	187579	327029		330168	145802	132083	132159			168536	265099	200244	108076	224953	91563.4	183179	210381
TG(54:2)_Glycerolipids_Triradylglycerols_Triacylglycerols_904.8329@19.89										149685													78957.4	124017	227533
TG(54:2)_Glycerolipids_Triradylglycerols_Triacylglycerols_904.8331@19.78							146477			181322															174271
TG(54:3)_Glycerolipids_Triradylglycerols_Diacylglycerophosphates_902.8170@25.01
TG(54:3)_Glycerolipids_Triradylglycerols_Diacylglycerophosphates_902.8172@24.74
TG(54:3)_Glycerolipids_Triradylglycerols_Triacylglycerols_885.7885@22.33
TG(54:3)_Glycerolipids_Triradylglycerols_Triacylglycerols_902.8165@23.94
TG(54:4)_Glycerolipids_Triradylglycerols_Diacylglycerophosphates_900.8090@25.23
TG(54:4)_Glycerolipids_Triradylglycerols_Diacylglycerophosphates_900.8095@25.11																			351945
TG(54:4)_Glycerolipids_Triradylglycerols_Triacylglycerols_883.7728@19.63
TG(54:4)_Glycerolipids_Triradylglycerols_Triacylglycerols_900.8028@23.98
TG(54:5)_Glycerolipids_Triradylglycerols_1-alkyl,2-acylglycerophosphates_881.7570@24.69
TG(54:5)_Glycerolipids_Triradylglycerols_1-alkyl,2-acylglycerophosphates_898.7939@24.32															26039									56462.2
TG(54:5)_Glycerolipids_Triradylglycerols_Diacylglycerophosphates_898.7942@25.20									62802.6														39672.6
TG(54:5)_Glycerolipids_Triradylglycerols_Diacylglycerophosphates_898.7948@24.80		71515.6				48552.1			83578.5								29713.6	74944.3		31161.3				61520.1
TG(54:5)_Glycerolipids_Triradylglycerols_Triacylglycerols_898.7867@23.31
TG(54:5)_Glycerolipids_Triradylglycerols_Triacylglycerols_898.7938@21.29									61258.5			76135.6											22508
TG(54:5)_Glycerolipids_Triradylglycerols_Triacylglycerols_898.7941@20.76																			51195.9
TG(54:6)_Glycerolipids_Triradylglycerols_Triacylglycerols_879.7412@23.74						937255	922576	1.32525e+06	1.08872e+06	938651	1.81166e+06	1.04024e+06	594856	727571	1.01316e+06	1.91036e+06		900728	645163		953169	481475	291436	491297	862062
TG(54:6)_Glycerolipids_Triradylglycerols_Triacylglycerols_879.7414@23.92
TG(54:6)_Glycerolipids_Triradylglycerols_Triacylglycerols_896.7708@22.71
TG(54:7)_Glycerolipids_Triradylglycerols_Triacylglycerols_877.7257@23.26
TG(54:7)_Glycerolipids_Triradylglycerols_Triacylglycerols_894.7550@22.68												45674.2				107721
TG(54:8)_Glycerolipids_Triradylglycerols_Triacylglycerols_875.7101@22.71							30622.9
TG(55:2)_Glycerolipids_Triradylglycerols_Triacylglycerols_901.8135@23.03																			30310.3
TG(55:4)_Glycerolipids_Triradylglycerols_Diacylglycerophosphates_914.8144@25.22																		24807.8
TG(55:6)_Glycerolipids_Triradylglycerols_1-(1Z-alkenyl),2-acylglycerophosphates_893.7569@24.23						50681.8	127168	220933	160285	122816	243734			87873	143626	297217
TG(55:6)_Glycerolipids_Triradylglycerols_Triacylglycerols_910.7910@20.00															27594.6
TG(56:1)_Glycerolipids_Triradylglycerols_Triacylglycerols_934.8796@22.40
TG(56:10)_Glycerolipids_Triradylglycerols_Triacylglycerols_899.7098@22.67											86108				53713.8	103174
TG(56:10)_Glycerolipids_Triradylglycerols_Triacylglycerols_916.7453@16.61
TG(56:3)_Glycerolipids_Triradylglycerols_Diacylglycerophosphates_930.8488@24.74						198279	242262	312558	400828	264354	335883	188459	213963	191378		472160		274219			190994
TG(56:4)_Glycerolipids_Triradylglycerols_Triacylglycerols_911.8041@22.40
TG(56:4)_Glycerolipids_Triradylglycerols_Triacylglycerols_928.8333@23.98
TG(56:5)_Glycerolipids_Triradylglycerols_Triacylglycerols_909.7882@19.77										640746					202883		291840					165101	282502	442553	602448
TG(56:5)_Glycerolipids_Triradylglycerols_Triacylglycerols_909.7883@19.87						327000		342406									223976				304886	188242		249766
TG(56:5)_Glycerolipids_Triradylglycerols_Triacylglycerols_926.8177@23.30
TG(56:6)_Glycerolipids_Triradylglycerols_Diacylglycerophosphates_907.7727@24.74
TG(56:6)_Glycerolipids_Triradylglycerols_Diacylglycerophosphates_907.7727@25.01
TG(56:6)_Glycerolipids_Triradylglycerols_Triacylglycerols_924.8008@23.88											121321	65036.1				117479
TG(56:7)_Glycerolipids_Triradylglycerols_Triacylglycerols_905.7570@23.98
TG(56:7)_Glycerolipids_Triradylglycerols_Triacylglycerols_922.7855@23.52								98449.2			139296	85295.7				203963
TG(56:8)_Glycerolipids_Triradylglycerols_Triacylglycerols_903.7419@23.31
TG(56:8)_Glycerolipids_Triradylglycerols_Triacylglycerols_920.7699@22.73								71041.6			112811				50076.8	126981
TG(56:9)_Glycerolipids_Triradylglycerols_Triacylglycerols_901.7260@22.71
TG(57:5)_Glycerolipids_Triradylglycerols_1-alkyl,2-acylglycerophosphates_923.8151@24.43		41513.1													96540.4	99718.4
TG(58:10)_Glycerolipids_Triradylglycerols_Triacylglycerols_927.7410@23.51							102780	175697	142849		268214	135724		52429.1	112666	326371
TG(58:11)_Glycerolipids_Triradylglycerols_Triacylglycerols_925.7255@22.71								119173	77153.3		135062	78039.6			55719.7	192571
TG(58:7)_Glycerolipids_Triradylglycerols_1-alkyl,2-acylglycerophosphates_950.8162@24.57																53119.1
TG(58:7)_Glycerolipids_Triradylglycerols_Triacylglycerols_950.8173@23.92								58149.5			63185.5					94320.9
TG(58:8)_Glycerolipids_Triradylglycerols_Triacylglycerols_948.8016@23.56								128386			136947	122592		48037.5	89675.7	257252
TG(58:9)_Glycerolipids_Triradylglycerols_Triacylglycerols_929.7574@23.85								98024.1				41567.9				96448.5
TG(59:12)_Glycerolipids_Triradylglycerols_Diacylglycerophosphates_954.7573@24.95
TG(60:10)_Glycerolipids_Triradylglycerols_1-alkyl,2-acylglycerophosphates_955.7733@24.54																66174.5
TG(60:10)_Glycerolipids_Triradylglycerols_Triacylglycerols_955.7727@23.92																115511
TG(60:11)_Glycerolipids_Triradylglycerols_Triacylglycerols_953.7569@23.58								241939	197738		270536	176519	66042.7		116070	332428
TG(60:15)_Glycerolipids_Triradylglycerols_Triacylglycerols_962.7237@22.61
TG(60:9)_Glycerolipids_Triradylglycerols_Diacylglycerophosphates_974.8131@25.24				1.40351e+06	1.49678e+06				1.35995e+06	1.27244e+06				1.11855e+06	1.2116e+06	1.09376e+06					1.13823e+06	1.32756e+06	1.39085e+06	1.433e+06	1.32407e+06
TG(60:9)_Glycerolipids_Triradylglycerols_Triacylglycerols_974.8125@15.06									103062
TG(60:9)_Glycerolipids_Triradylglycerols_Triacylglycerols_974.8139@14.24																								29847.3
TG(61:13)_Glycerolipids_Triradylglycerols_Diacylglycerophosphates_980.7697@25.27
TG(61:9)_Glycerolipids_Triradylglycerols_Diacylglycerophosphates_971.8041@25.21																29816.8
TG(63:13)_Glycerolipids_Triradylglycerols_Diacylglycerophosphates_1008.8068@25.22																								36730.5
TG(66:14)_Glycerolipids_Triradylglycerols_Triacylglycerols_1048.8230@15.76																	80488							41965.8
