# Supplementary material for: Cellular level lipidomics of two-dimensional cultures of adherent gut epithelial cell lines confirms a metabolic switch
Source: Royal Society of Chemistry journal article supplement (doi:10.1039/d5an01183c), 2026-04-27
Supplement: d5an01183c2.pdf [file d5an01183c2.pdf]

## Cellular level lipidomics of two-dimensional cultures of adherent gut epithelial cell lines confirms a metabolic switch

Qianying Xu<sup>a†</sup>, Jake Penny<sup>b†</sup>, Emily Fraser<sup>b</sup>, Federica Orsenigo<sup>c</sup>, Matteo Barberis<sup>a,d</sup>, Lee Gethings<sup>a,c,e</sup>, Melanie Bailey<sup>b,f</sup> Clare Mills<sup>a,c</sup>

<sup>a</sup>*Division of Immunology, Immunity to Infection and Respiratory Medicine, School of Biological Sciences, Manchester Institute of Biotechnology, University of Manchester, Manchester, United Kingdom*

<sup>b</sup>*School of Chemistry and Chemical Engineering, Faculty of Engineering and Physical Sciences, University of Surrey, GU2 7XH, Guildford, United Kingdom.*

<sup>c</sup>*School of Biosciences, University of Surrey, Guildford, United Kingdom.*

<sup>d</sup>*Centre for Mathematical and Computational Biology, CMCB, University of Surrey, Guildford, United Kingdom.*

<sup>e</sup>*Waters Corporation, Wilmslow, United Kingdom*

<sup>f</sup>*Department of Infectious Diseases, Guy's Hospital, King's College London, London, UK*

†These authors contributed equally to this work.

Correspondence should be sent to Professor Clare Mills [clare.mills@surrey.ac.uk](mailto:clare.mills@surrey.ac.uk)

### Contents

|                                                                                                                                                          |   |
|----------------------------------------------------------------------------------------------------------------------------------------------------------|---|
| Table S1: Cell picking log.....                                                                                                                          | 1 |
| Table S2. Lipidomic pathway differences between Caco-2 and HT29-MTX cells .....                                                                          | 3 |
| Figure S1. Micrograph of Caco-2 cells 1h TrypLE treatment. ....                                                                                          | 4 |
| Figure S2: Annotated PCA plot .....                                                                                                                      | 5 |
| Figure S3. Volcano plot showing the fold changes in the lipid abundance between Caco-2 and HT29-MTX with detailed annotation of each lipid feature. .... | 6 |
| Figure S4. Hierarchical clustering heatmap top 100 (a) and top 50 (b) features with highest variance between individual Caco-2 cell samples. ....        | 7 |
| Figure S5. Differential lipid distribution between Caco-2 and HT29-MTX cells after subset test. ....                                                     | 8 |

Table S1: Cell picking log

| <b>Cell Sample</b>    | <b>Comment</b>                                                                                              | <b>No of cells</b> |
|-----------------------|-------------------------------------------------------------------------------------------------------------|--------------------|
| <b>Caco2 cells</b>    |                                                                                                             |                    |
| CaCo_02_01            | One cell plus one cell body. Clean pick. Stained with Hoechst 1:20,000 to allow validation of cell picking. | Two                |
| CaCo_02_02            | Two cells                                                                                                   | Two                |
| CaCo_02_03            | One cell confirmed on Z stack                                                                               | One                |
| CaCo_02_04            | One cell, clean pick, confirmed on Z stack                                                                  | One                |
| CaCo_02_05            | Three cells, confirmed on Z stack.                                                                          | Three              |
| CaCo_02_06            | One cell, clean pick.                                                                                       | One                |
| CaCo_02_07            | One cell., confirmed on Z stack.                                                                            | One                |
| CaCo_02_08            | One cell.                                                                                                   | One                |
| CaCo_02_09            | One cell                                                                                                    | One                |
| CaCo_02_10            | One cell                                                                                                    | One                |
| CaCo_02_11            | One cell, confirmation by video and initial Z stack.                                                        | One                |
| <b>HT-29MTX cells</b> |                                                                                                             |                    |
| HT29_01               | Not clear cell pick; data excluded from analysis                                                            | None               |
| HT29_02               | Multiple cells – difficult to confirm by microscopy due to mucus.                                           | Four               |
| HT29_03               | Single cell although microscopic confirmation difficult to establish due to mucus                           | One                |
| HT29_04               | ~ Eight cells.                                                                                              | Eight              |
| HT29_05               | ~ Three cells plus debris.                                                                                  | Three              |

|         |                                                 |       |
|---------|-------------------------------------------------|-------|
| HT29_06 | Difficult to estimate cell numbers due to mucus | Ten   |
| HT29_07 | ~ Four cells                                    | Four  |
| HT29_08 | ~ Ten cells, including detached floating cells. | Ten   |
| HT29_09 | ~ Eight cells                                   | Eight |

\* The number of cells collected by the capillary was noted during at the time of collection and and subsequently verified against the recorded sampling video for the best estimation.

\*\*Sample HT29\_01 has been excluded from the analysis as no cell was sampled.

**Table S2. Lipidomic pathway differences between Caco-2 and HT29-MTX cells**

| <b>Reaction chains</b>                        | <b>Z-score</b> |
|-----------------------------------------------|----------------|
| <b>Lipid subclass active reaction</b>         |                |
| DG→TG                                         | 3.135          |
| LPC→PC                                        | 2.426          |
| DG→PC→LPC                                     | 2.106          |
| DG→PC→PS→PE                                   | 1.73           |
| <b>Lipid subclass suppressed reaction</b>     |                |
| PC→LPC                                        | 1.92           |
| PC→PS                                         | 1.901          |
| TG→DG                                         | 1.836          |
| <b>Lipid species most active reaction</b>     |                |
| DG(35:3) → TG(53:5)                           | 2.937          |
| DG(34:2) → PC(34:2) → PS(34:2)                | 2.589          |
| LPC(18:0) → PC(36:2)                          | 2.234          |
| DG(34:4) → TG(52:6) → DG(34:6)                | 1.885          |
| DG(36:2) → PC(36:2)                           | 1.835          |
| DG(38:7) → TG(58:8)                           | 1.773          |
| <b>Lipid species most suppressed reaction</b> |                |
| PC(O-36:1) → PS(O-36:1)                       | 3.104          |
| LPC(18:0) → PC(38:1)                          | 1.929          |

\*Generated from BioPAN<sup>1</sup>

BioPAN is a pathway analysis tool powered by LipidMAPs. It compares the relative abundances of the molecules or lipid classes provided between two experimental conditions when mapping to the lipidmaps database. When the imported lipid species mapped to

known enzymatic transformation in the lipidmaps database, Biopan calculated the log-transformed abundances between product and substrate species across conditions, presented as Z-score, which considers the mean and standard deviation. This Z-score represents how strongly the observed substrate-product lipids deviates from the expected direction under no pathway changes:

- A **positive Z-score** indicates relative accumulation of products compared to substrates, suggesting pathway activation.
- A **negative Z-score** indicates relative accumulation of substrates compared to products, suggesting pathway suppression.
- Z-scores near zero indicate no consistent directional change.

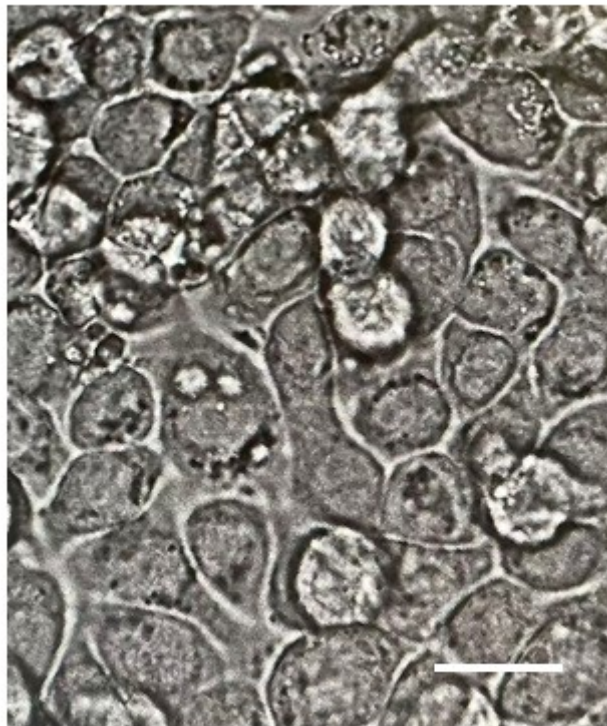

**Figure S1. Micrograph of Caco-2 cells 1h TrypLE treatment.**

Cells were incubated at 37°C in SS2000 sampling chamber supplemented with 5% CO<sub>2</sub>.

Scale bar = 50 μm.

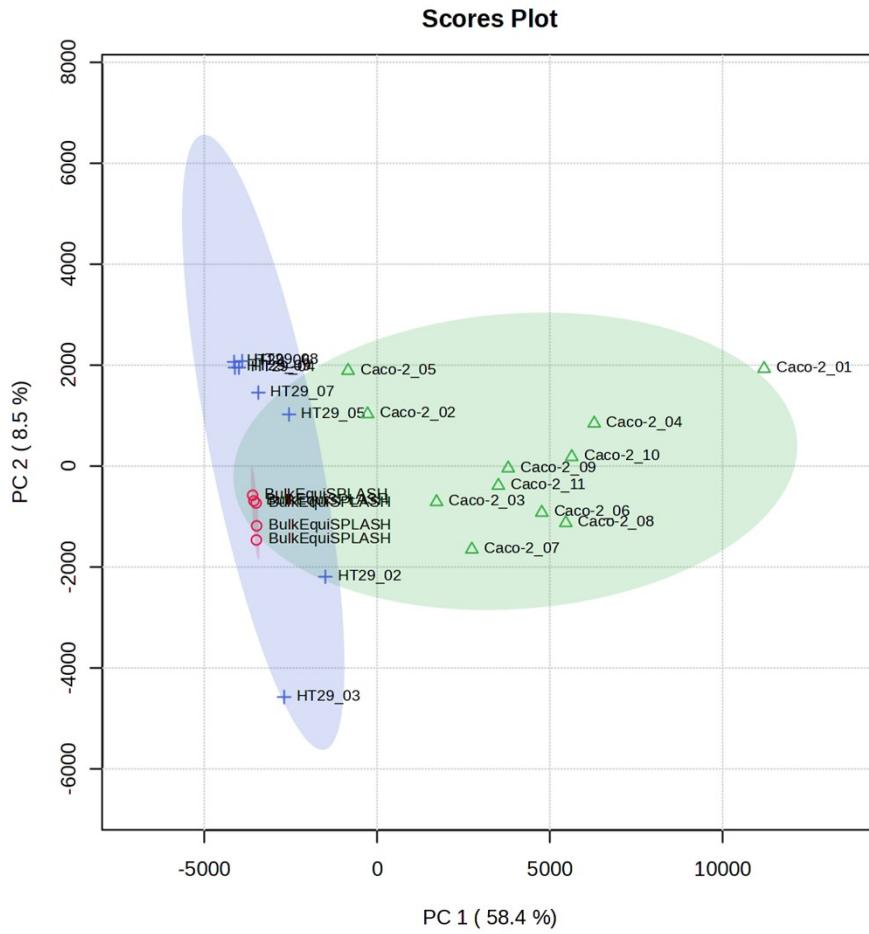

**Figure S2: Annotated PCA plot**

EquiSPLASH (n=5, red) and single-cell samples of Caco-2 (n=11, green) and HT29-MTX (n=8, blue). Cells are marked with sample number as described in Supplementary Table S1.

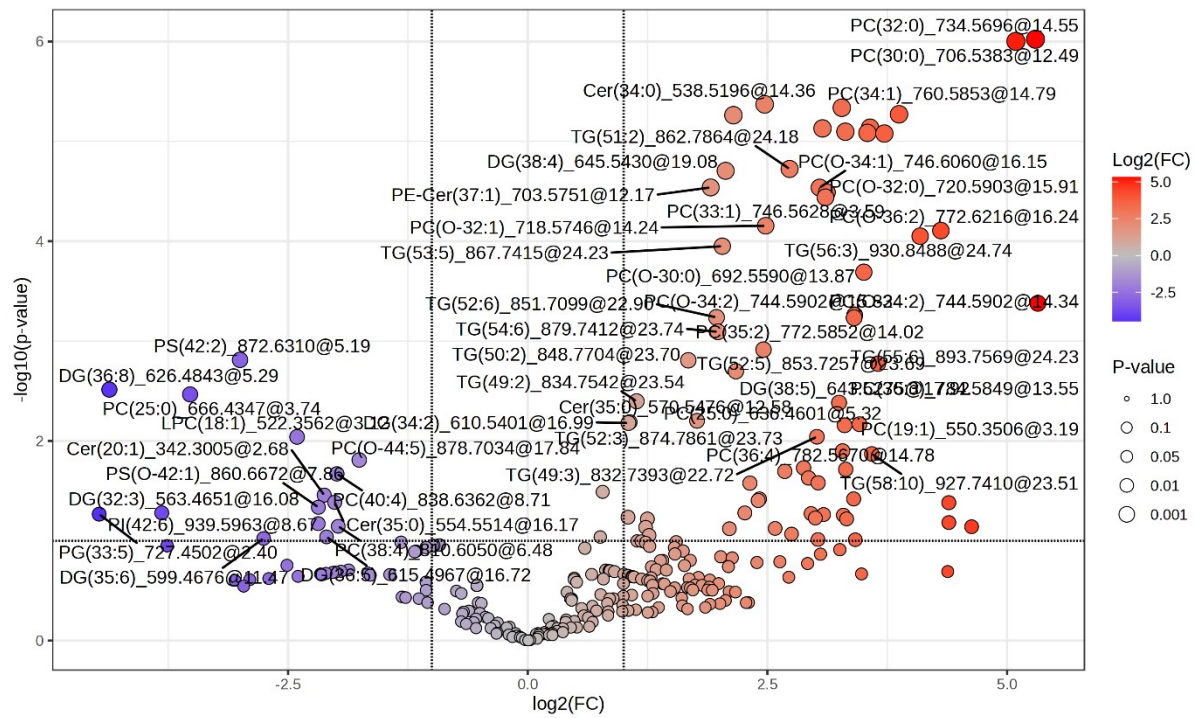

**Figure S3. Volcano plot showing the fold changes in the lipid abundance between Caco-2 and HT29-MTX with detailed annotation of each lipid feature.**

Lipid features are represented by coloured circles.

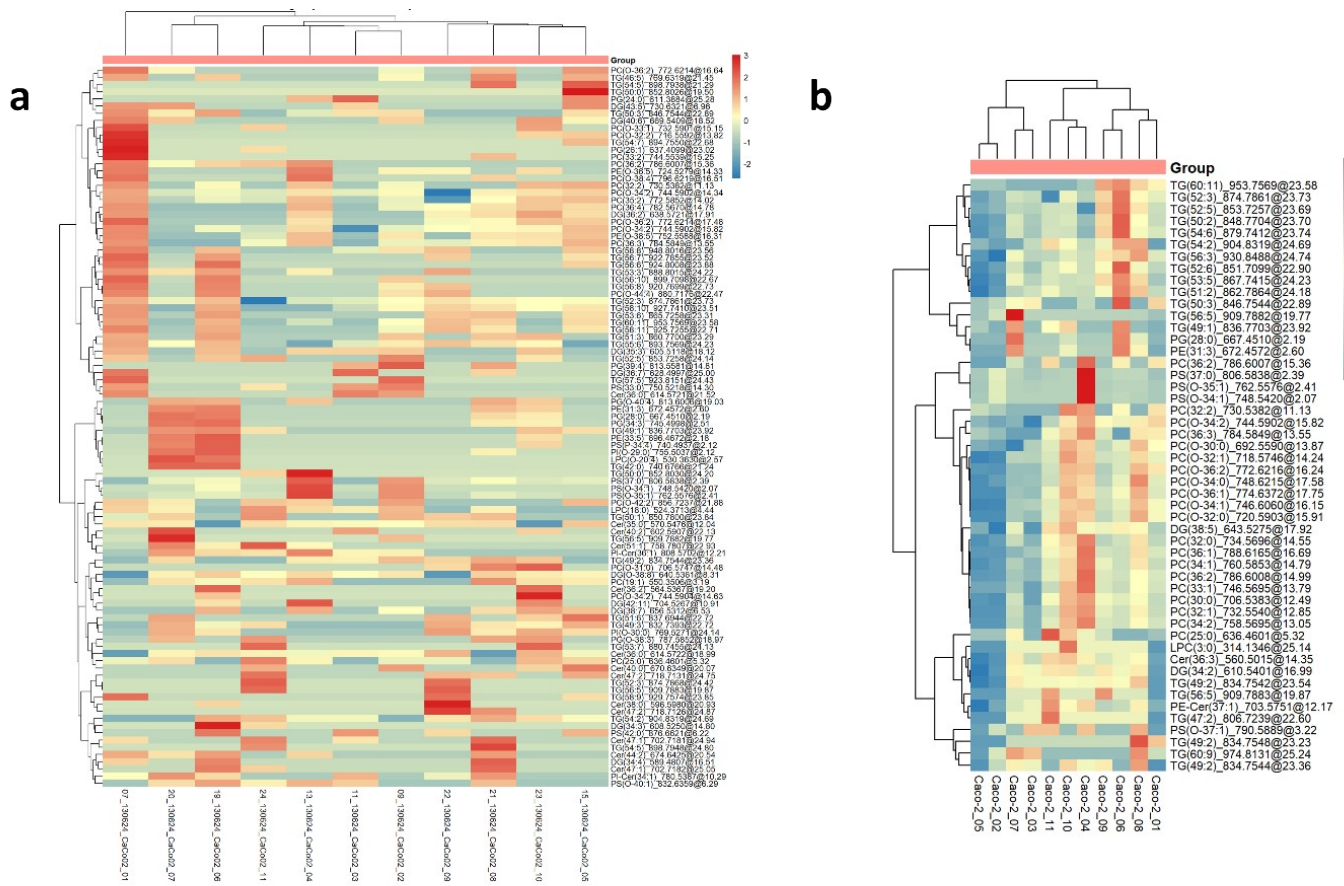

**Figure S4. Hierarchical clustering heatmap top 100 (a) and top 50 (b) features with highest variance between individual Caco-2 cell samples.**

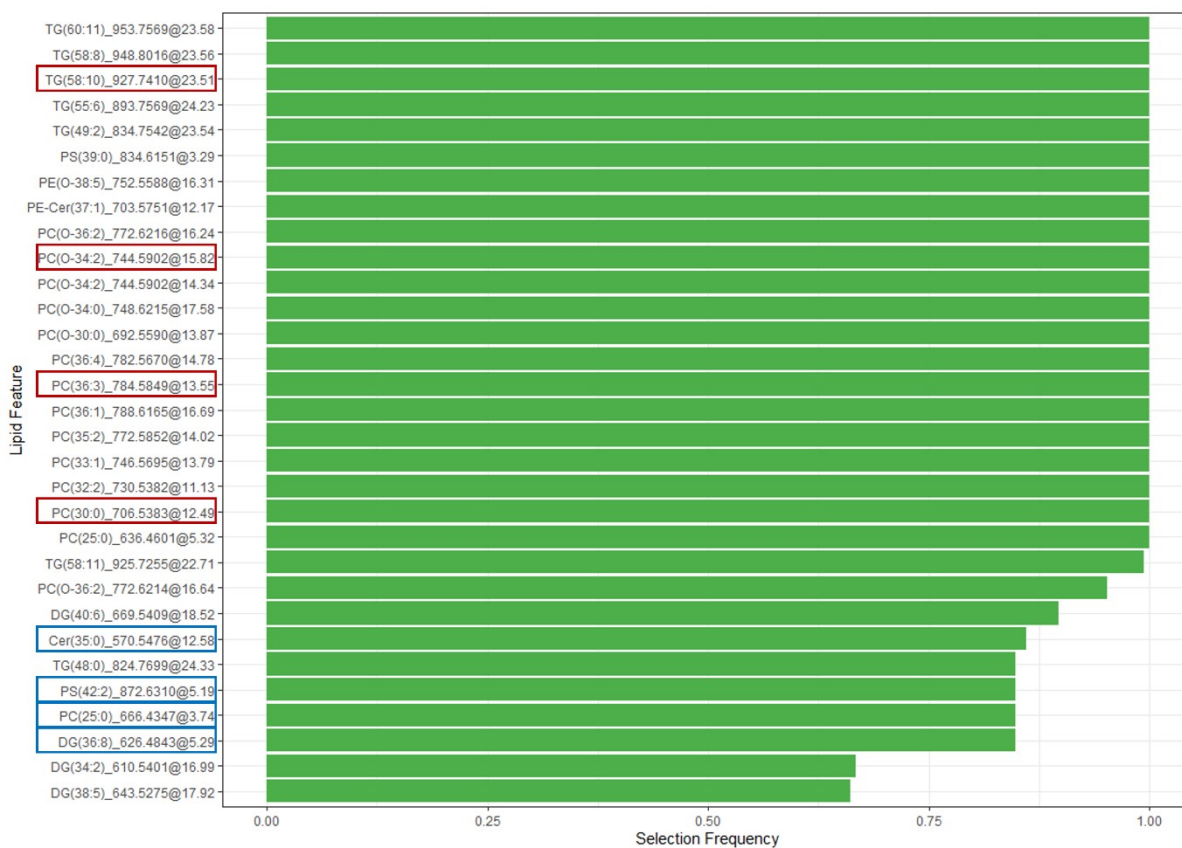

**Figure S5. Differential lipid distribution between Caco-2 and HT29-MTX cells after subset test.**

Selection frequency represents the proportion of all 165 combination of Caco-2 sub-samples in which the lipids remained significant after Welch's t-test and false discovery rate correction. Highlighted lipids in brackets indicating the corresponding lipids identified from the full dataset for Caco-2 (red) and HT29-MTX (blue) cells in Figure 4b.

## References

1. C. Gaud, B. C. Sousa, A. Nguyen, M. Fedorova, Z. Ni, V. B. O'Donnell, M. J. Wakelam, S. Andrews and A. F. Lopez-Clavijo, F1000Research, 2021, 10, 4.
